# Supplementary material for: Classifying cGAS-STING Activity Links Chromosomal Instability with Immunotherapy Response in Metastatic Bladder Cancer
Source: PubMed Central journal article supplement (PMC10010288; doi:10.1158/2767-9764.crc-22-0047), 2022-08-04
Supplement: crc-22-0047-s01.pdf [file crc-22-0047-s01.pdf]

## Supplement Material for

### **Classifying cGAS-STING activity links chromosomal instability with immunotherapy response in metastatic bladder cancer**

|                         |                                                                                                           |
|-------------------------|-----------------------------------------------------------------------------------------------------------|
| Supplementary Table 1   | cGAS-STING interacting genes                                                                              |
| Supplementary Table 2   | Table showing molecular characteristics of CSG1-4 in TCGA                                                 |
| Supplementary Table 3   | Table showing summary of identified CSG in the BLCA immunotherapy cohort                                  |
| Supplementary Table 4   | Table shows coefficients on BLCA immunotherapy cohort based on cox proportional hazard multivariate model |
| Supplementary Figure 1  | Page 5                                                                                                    |
| Supplementary Figure 2  | Page 6                                                                                                    |
| Supplementary Figure 3  | Page 7                                                                                                    |
| Supplementary Figure 4  | Page 8                                                                                                    |
| Supplementary Figure 5  | Page 9                                                                                                    |
| Supplementary Figure 6  | Page 10                                                                                                   |
| Supplementary Figure 7  | Page 11                                                                                                   |
| Supplementary Figure 8  | Page 12                                                                                                   |
| Supplementary Figure 9  | Page 13                                                                                                   |
| Supplementary Figure 10 | Page 14                                                                                                   |
| Supplementary Figure 11 | Page 15                                                                                                   |
| Supplementary Figure 12 | Page 16                                                                                                   |

## SUPPLEMENTARY TABLES

**Supplementary Table 1: cGAS-STING interacting genes**

| Gene    | Reference                                      |
|---------|------------------------------------------------|
| STING1  | [16], [17], [19], [28], [30], [48], [37], [18] |
| NFKB1   | [16],[17],[28],[30],[37],[42]                  |
| IKBKG   | [48]                                           |
| TRAF6   | [37,49]                                        |
| RELA    | [16],[17],[28],[30],[37]                       |
| NFKB2   | [16],[17],[28],[37],[42],[48]                  |
| RELB    | [16],[17],[28],[48],[37],[42]                  |
| MAP3K14 | [18, 48]                                       |
| CCL5    | [19]                                           |
| CXCL9   | [16,19]                                        |
| CXCL10  | [16,19]                                        |
| CXCL11  | [19]                                           |
| CGAS    | [16],[17],[19],[28],[30]                       |
| ENPP1   | [28]                                           |
| TREX1   | [37,48,49]                                     |
| IFI16   | [28],[48]                                      |
| IRF3    | [16],[17],[28],[30],[37],[49]                  |
| ATM     | [18, 48]                                       |
| TBK1    | [17],[28],[30],[48],[37],[18]                  |
| PARP1   | [18, 48]                                       |

**Supplementary Table 2: Table showing the molecular characteristics of CSG1-4 in TCGA.**

| CSG | n    | wGII | TMB  | Responder genes | Activator genes | Responders-Activators ratio | Interpretation      |
|-----|------|------|------|-----------------|-----------------|-----------------------------|---------------------|
| 1   | 361  | 0.41 | 4.58 | 0.04            | 3.62            | 0.001                       | Inactive            |
| 2   | 309  | 0.51 | 3.51 | 2.12            | 2.93            | 0.723                       | Non-functional      |
| 3   | 1048 | 0.46 | 5.16 | 5.16            | 4.41            | 1.17                        | Active              |
| 4   | 589  | 0.47 | 3.22 | 2.98            | 4.28            | 0.69                        | Abnormal activation |

**Supplementary Table 3: Table showing the summary of identified CSG in the BLCA immunotherapy cohort**

| CSG | n   | wGII | TMB  | Responder genes | Activator genes | IO Responders |
|-----|-----|------|------|-----------------|-----------------|---------------|
| 1   | 59  | 0.31 | 0.66 | 0.50            | 2.86            | 3             |
| 2   | 65  | 0.39 | 1.68 | 0.93            | 2.49            | 18            |
| 3   | 138 | 0.42 | 1.73 | 2.55            | 3.25            | 33            |
| 4   | 86  | 0.39 | 1.19 | 1.31            | 3.16            | 14            |

**Supplementary Table 4: Table showing estimated coefficients, their confidence intervals, hazard ratio and p-value of multivariate cox-proportional hazard model in immunotherapy treated cohort**

|                   | Pr(> z )                   | 2.5 %             | 97.5 %            | coef               | exp(coef)        |
|-------------------|----------------------------|-------------------|-------------------|--------------------|------------------|
| Stage II          | <b>0.0203403748937784</b>  | 0.103194193813057 | 1.22670227074922  | 0.664948232281138  | 1.94438986210367 |
| Stage III         | <b>0.0190951008239468</b>  | 0.102769423905358 | 1.15266075046287  | 0.627715087184113  | 1.87332530039723 |
| Stage IV          | <b>0.00691135643931658</b> | 0.210104970967461 | 1.32138876353428  | 0.765746867250868  | 2.15059998769121 |
| CSG2              | 0.441871651781437          | -1.96638443993066 | 0.85812418536040  | -0.554130127285132 | 0.57457184824988 |
| CSG3              | 0.297427390259272          | -1.99564813060135 | 0.61027428260066  | -0.692686924000341 | 0.50023018124695 |
| CSG4              | 0.246936364549537          | -0.60227020207462 | 2.34092209479392  | 0.869325946359645  | 2.3853024896969  |
| wGII              | 0.444850517018845          | -2.99078018926334 | 1.31306603791549  | -0.838857075673923 | 0.43220421796213 |
| TMB               | 0.0613319062308628         | -1.90824464846835 | 0.04426547546405  | -0.931989586502148 | 0.39376949202887 |
| TIL               | 0.428140881579202          | -1.05225883130894 | 0.44638499035084  | -0.302936920479048 | 0.73864568831714 |
| Gender = Male     | 0.864794010288844          | -0.44893403915198 | 0.534359112728211 | 0.0427125367881154 | 1.04363784423917 |
| CSG2 - wGII       | 0.911691703472188          | -4.36608338041723 | 3.89843394249033  | -0.23382471896345  | 0.79150053877235 |
| CSG3 - wGII       | 0.907236972883025          | -2.57797550547985 | 2.90388471381611  | 0.162954604168133  | 1.17698325834159 |
| CSG4 - wGII       | 0.162014266915642          | -7.3902653073123  | 1.23593468638121  | -3.07716531046555  | 0.04608972169947 |
| CSG2- TMB         | 0.126749414736743          | -0.2335965136380  | 1.88154512643393  | 0.823974306397942  | 2.27954145474069 |
| CSG3 - TMB        | 0.19361621395722           | -0.42592427142464 | 2.10372884430321  | 0.838902286439286  | 2.3138256644108  |
| CSG4 - TMB        | 0.382146243489956          | -4.08394418534222 | 1.56505398657063  | -1.25944509938579  | 0.28381146997199 |
| wGII - TMB        | <b>0.0191915532513094</b>  | 0.363234549626664 | 4.09230579524581  | 2.22777017243624   | 9.27915208466129 |
| CSG2 - wGII- TMB  | 0.0701265343540397         | -5.02205283119336 | 0.19825756127655  | -2.4118976349584   | 0.08964501954049 |
| CSG3 - wGII- TMB  | <b>0.0443720743209857</b>  | -4.81381779544736 | -0.06134065225412 | -2.43757922385074  | 0.0873721039666  |
| CSG4 - wGII - TMB | 0.531132206789143          | -4.42498082079392 | 8.58078991890764  | 2.07790454905686   | 7.98771350356211 |

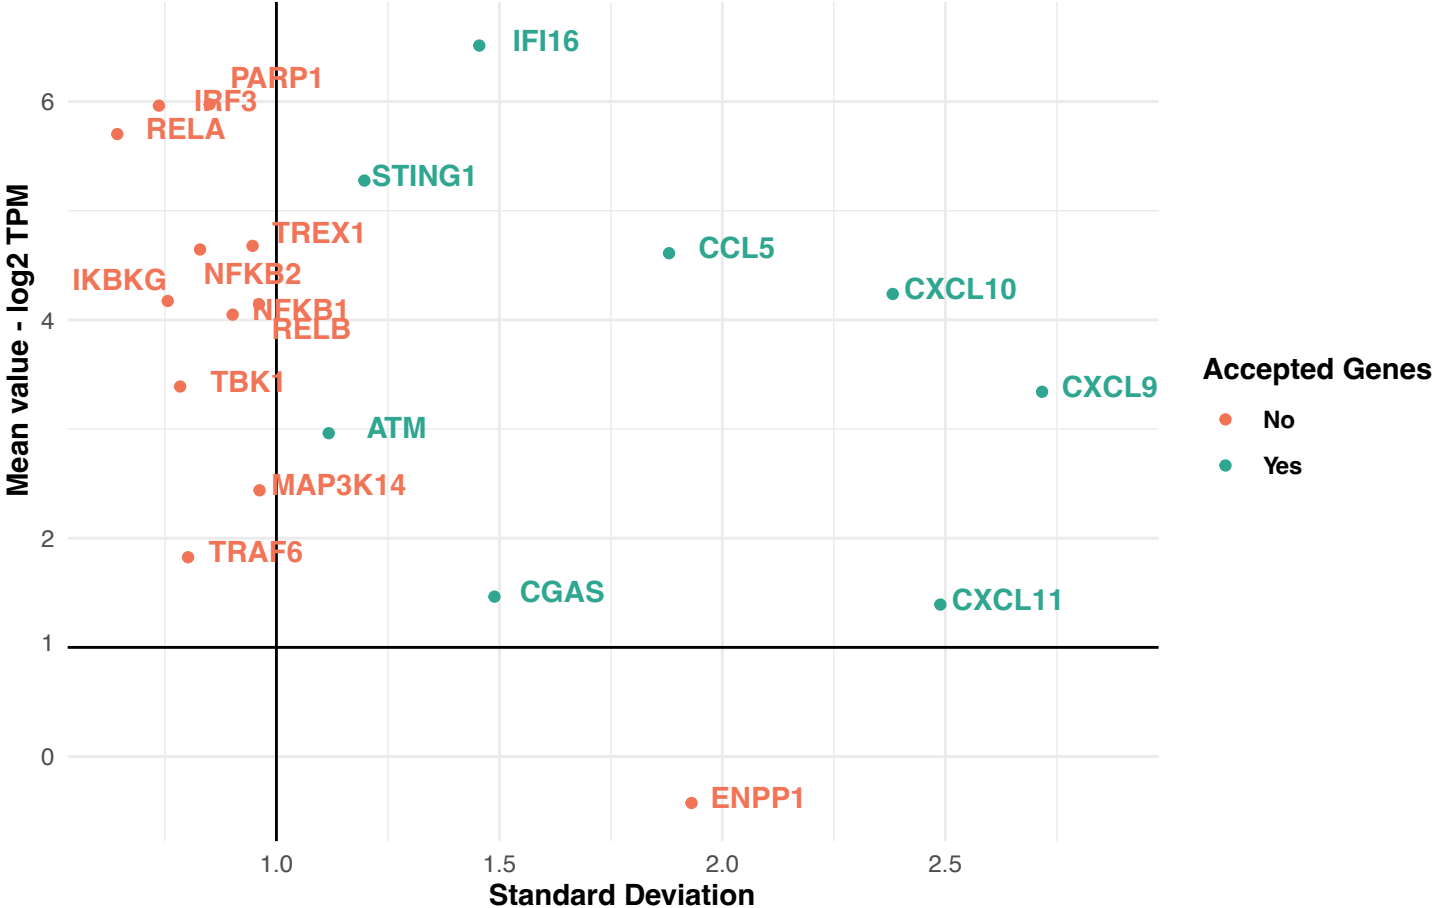

**Figure S1.** Scatter plot showing mean gene expression of the selected immune genes across the chosen cancer types (TCGA) versus the standard deviation. Values of “Yes” were used to identify genes with sufficient expression and high inter-sample variation.

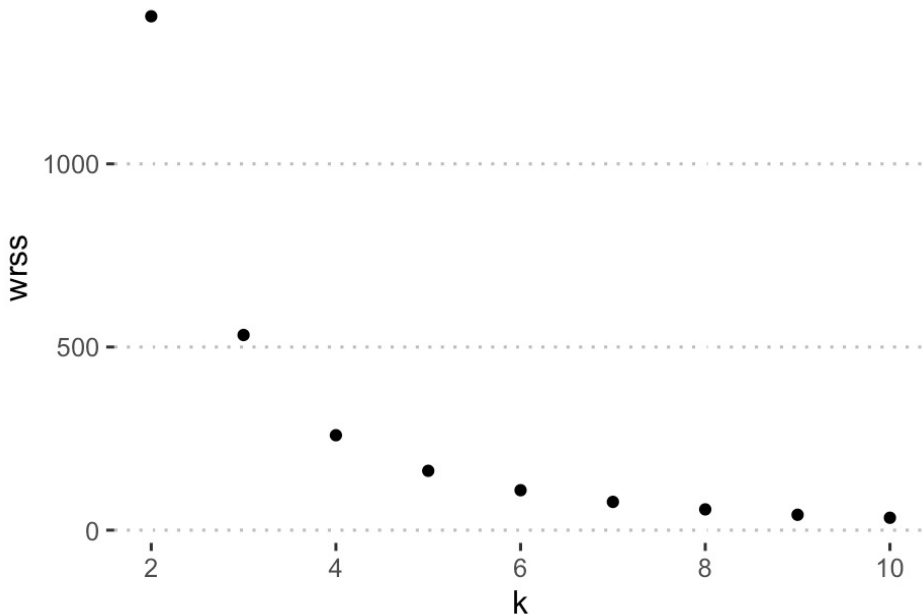

**Figure S2.** K-means elbow plot, showing Within-Cluster-Sum of Squared Errors (WSS) versus increasing values of K. Optimal number of clusters found at  $k=4$ .

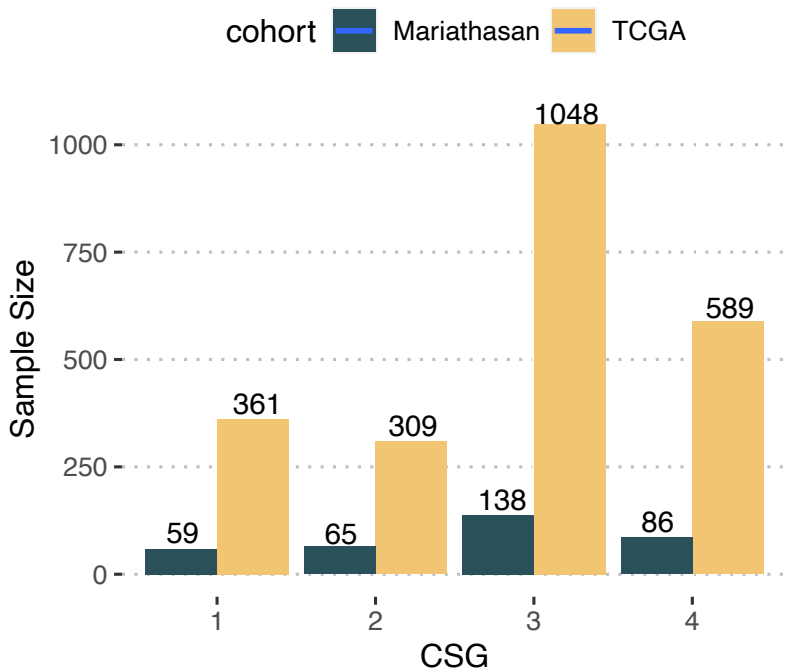

**Figure S3.** Sample sizes corresponding to each CSG and each cohort.

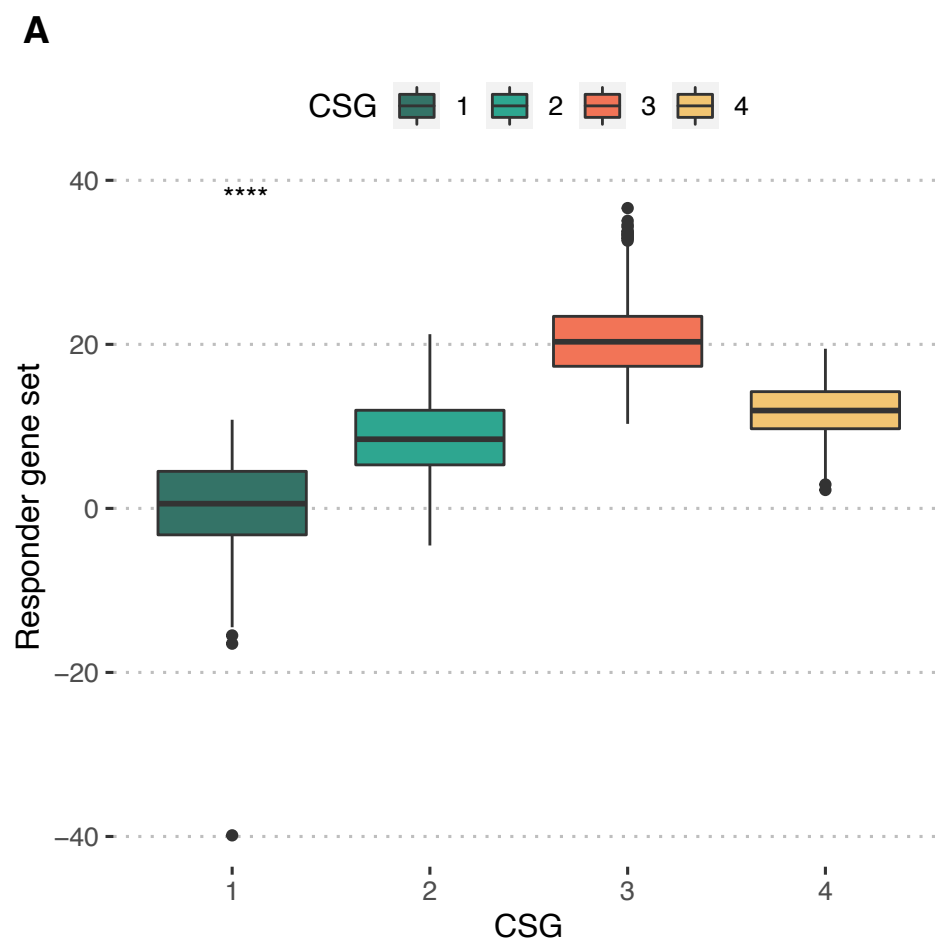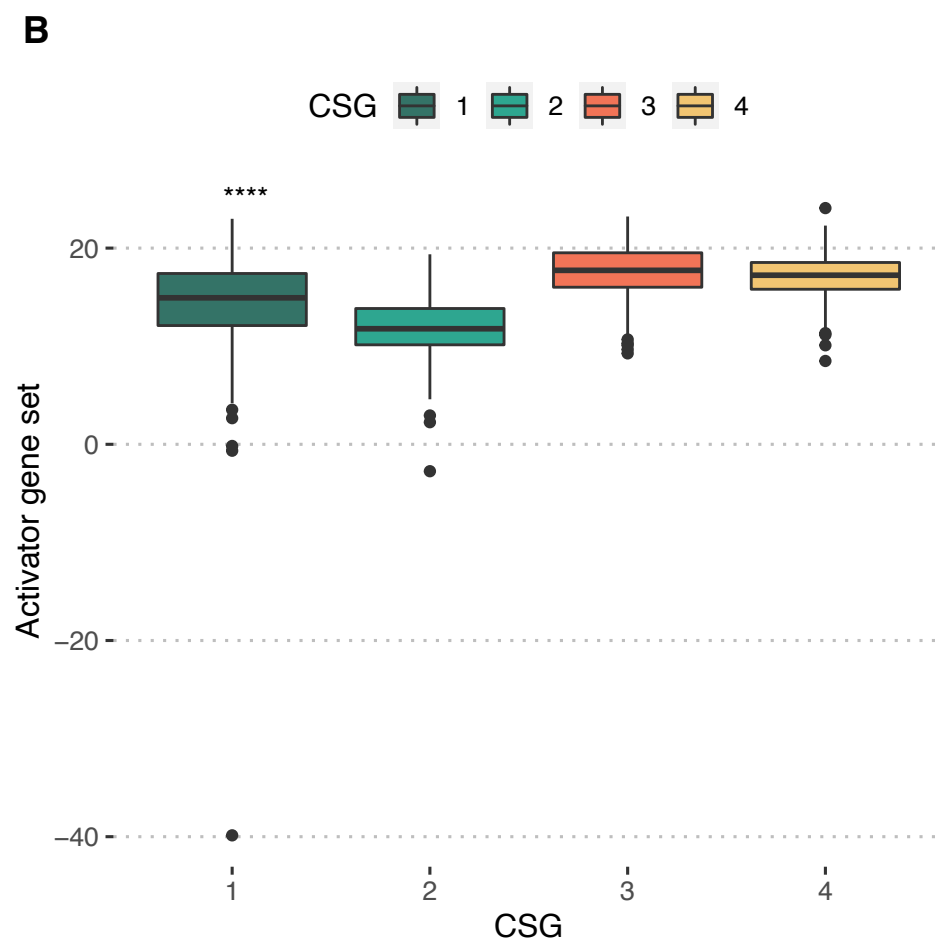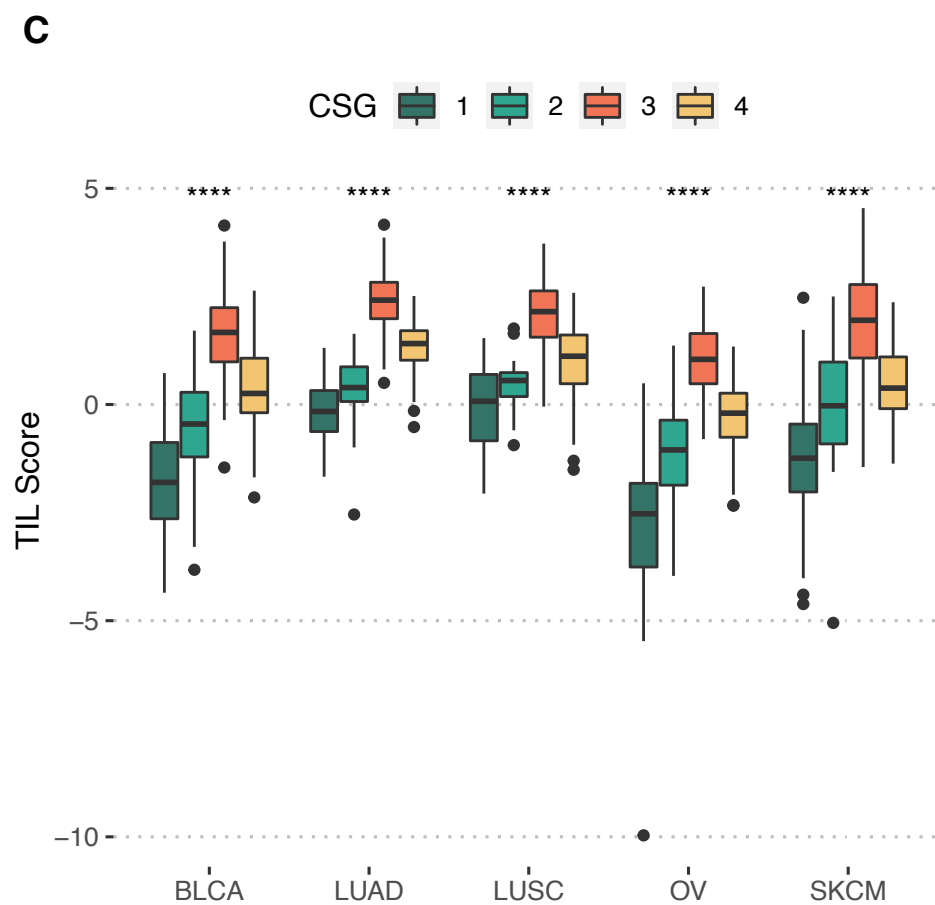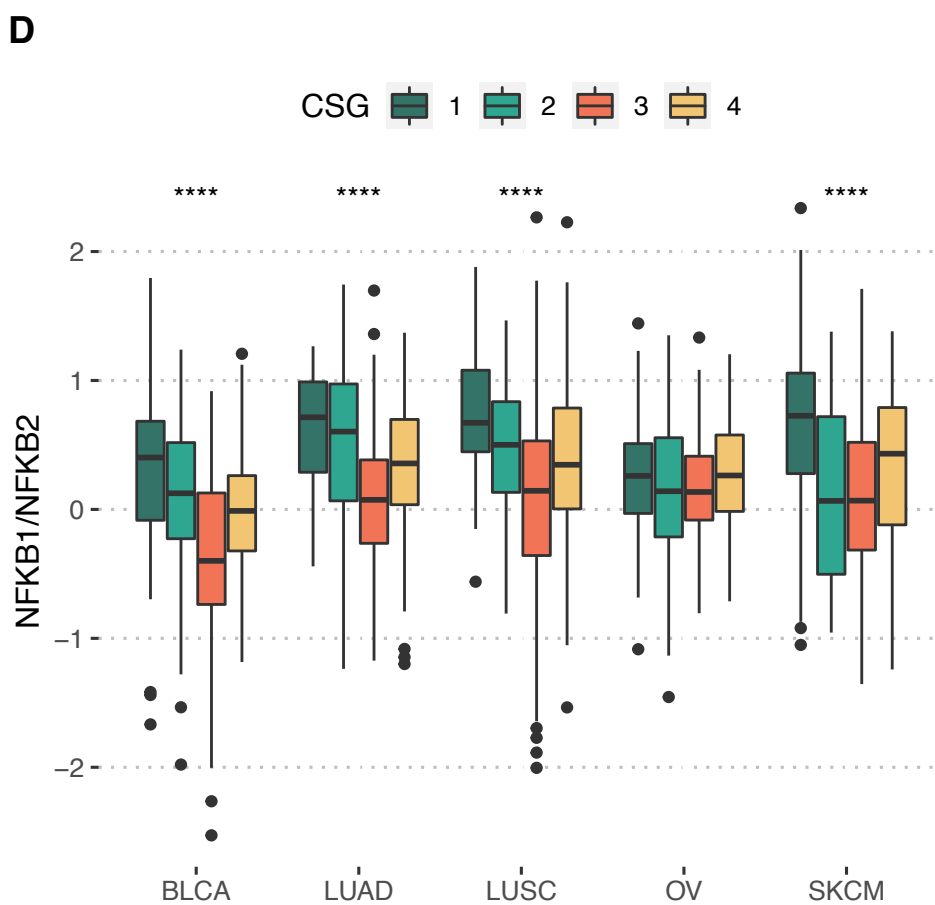

**Figure S4.** Mean expression of Activator (A) and Responder (B) genesets relative to CSG. (C) TIL score by CSG and by cancer type. (D) Gene expression ratio between NFKB1 and NFKB2 by CSG and by cancer type.



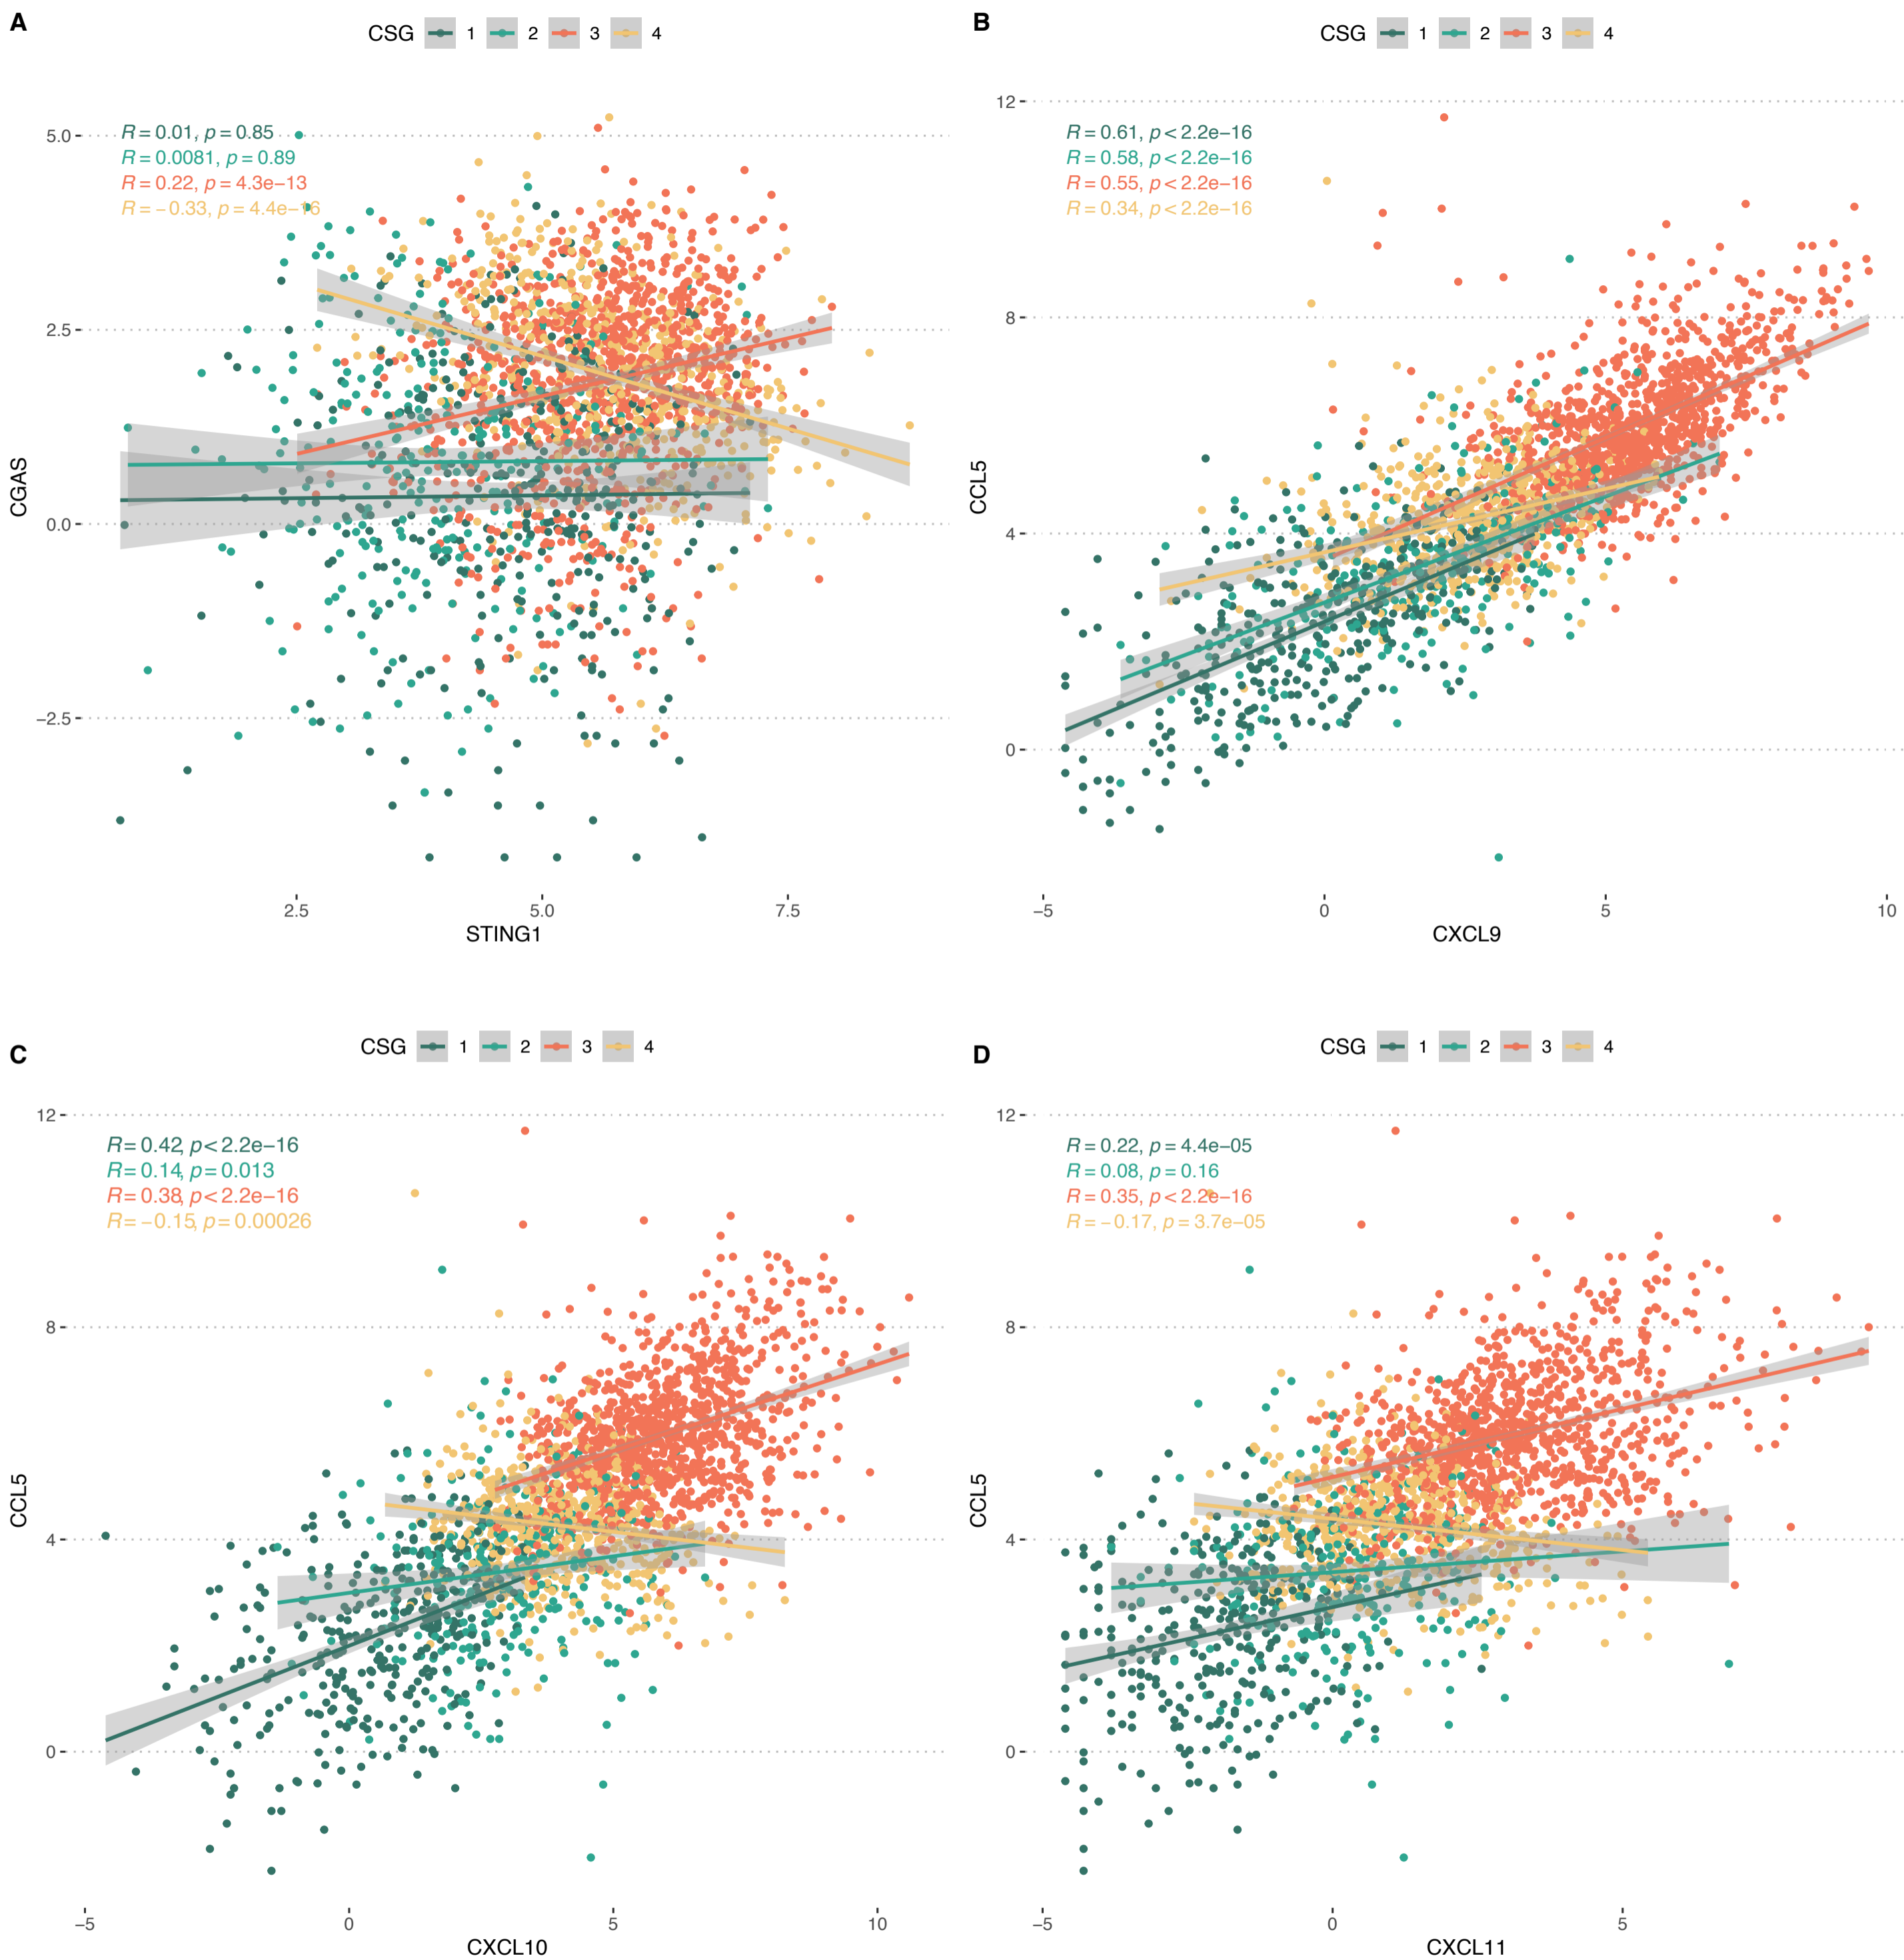

**Figure S5.** Scatter plots showing different correlation depending on CSG class between (A) Activator genes cGAS and STING1 within CSG 1–4, (B–D) Responder genes CCL5 and CXCL9, CXCL10 and CXCL11.

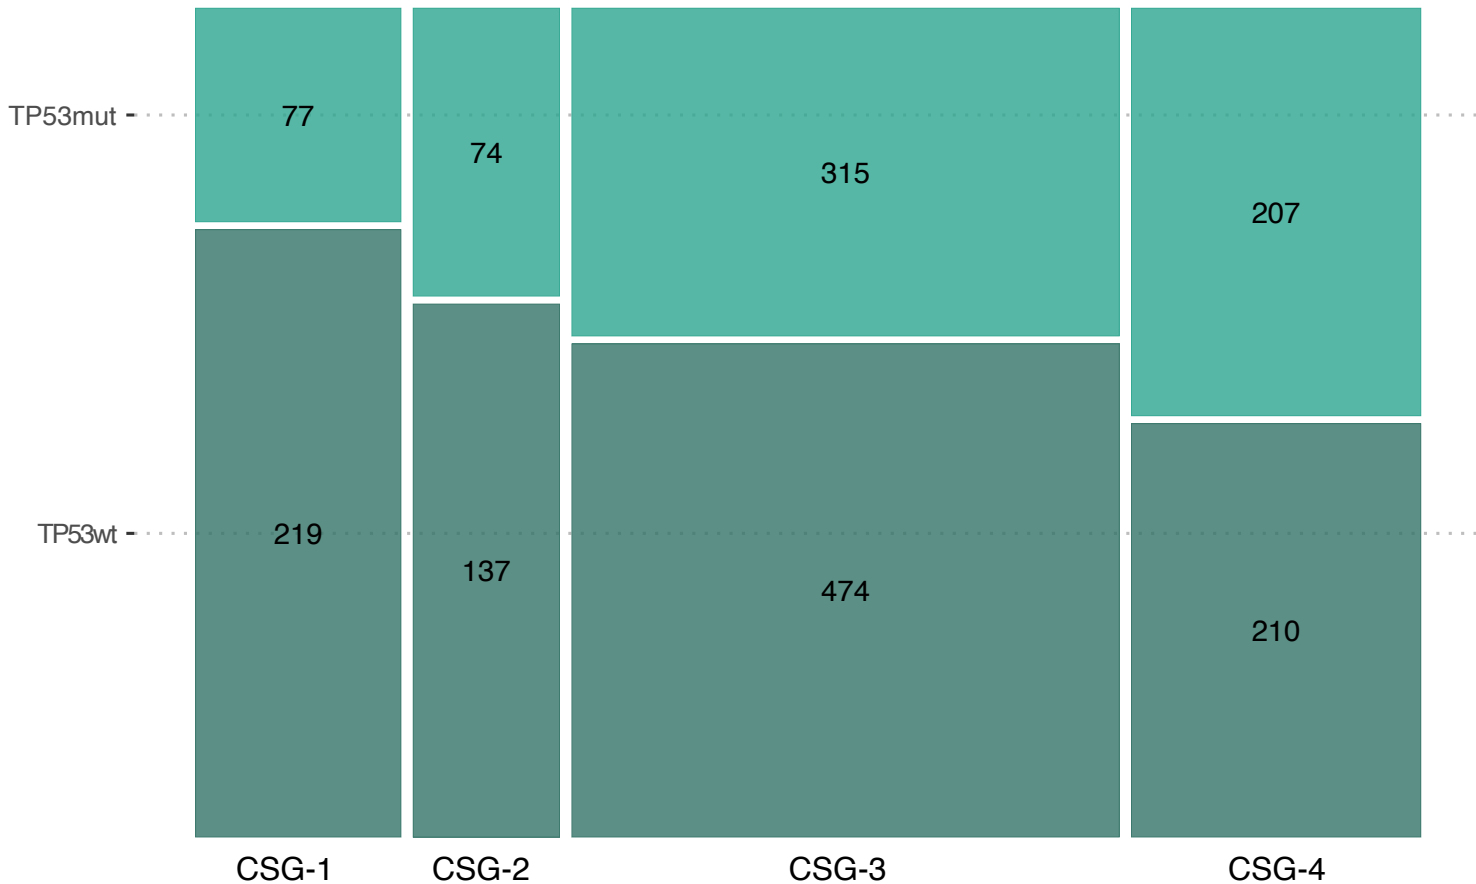

**Figure S6.** Distribution of samples with TP53 mutation by CSG across 2307TCGAtumours

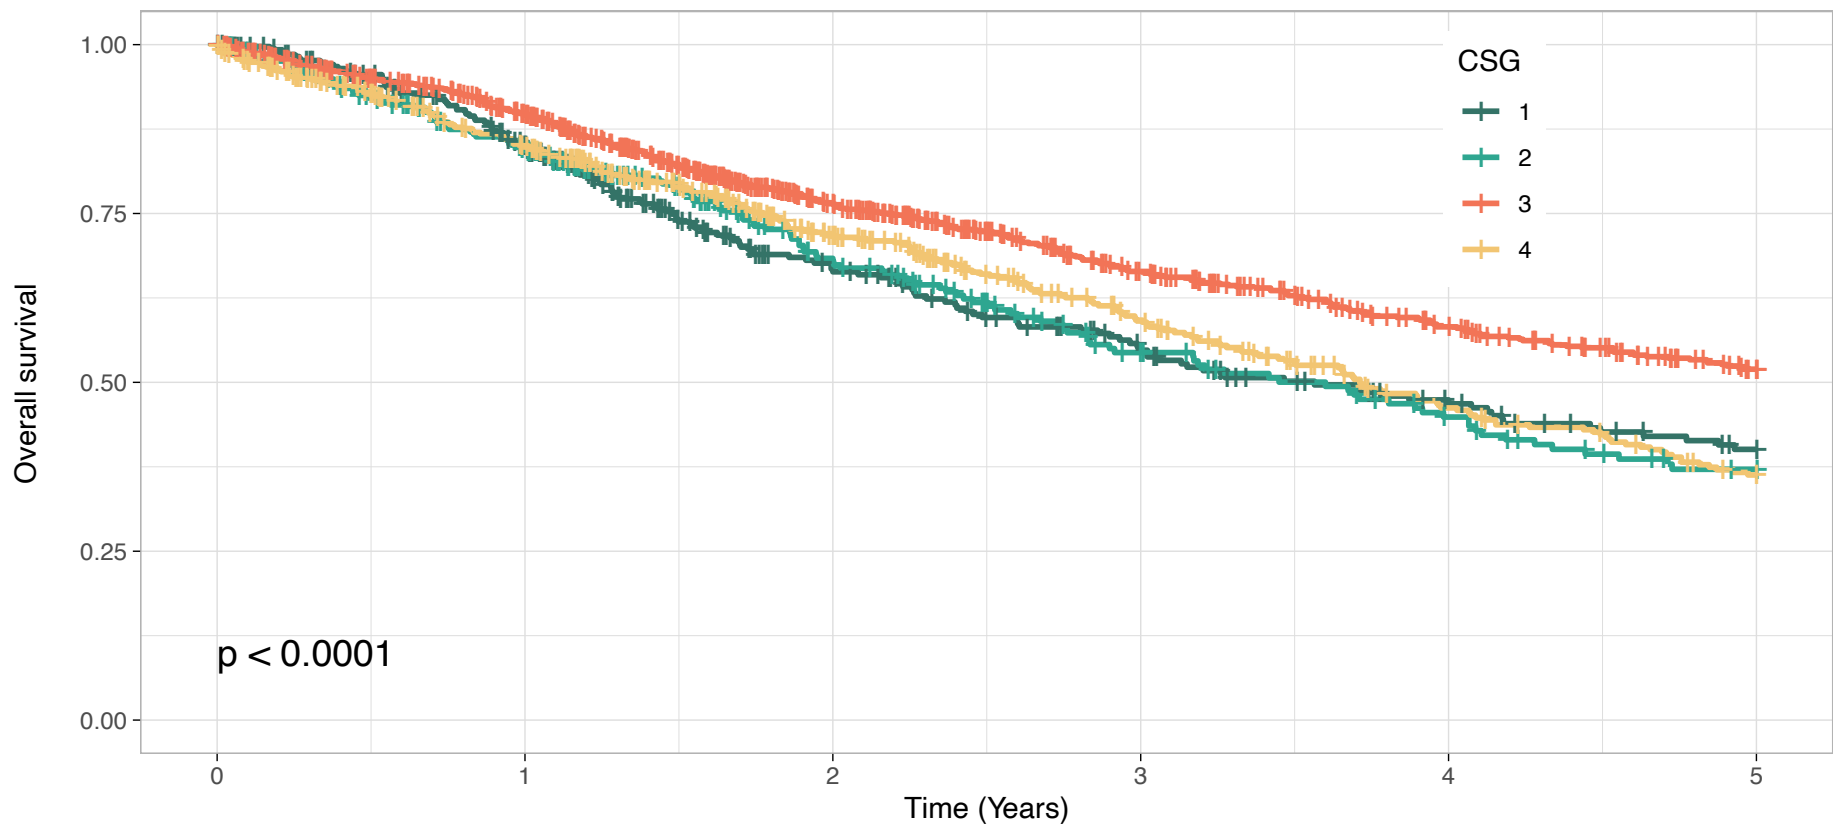

Number at risk: n (%)

| CSG | 0          | 1        | 2        | 3        | 4        | 5        |
|-----|------------|----------|----------|----------|----------|----------|
| 1   | 351 (100)  | 266 (76) | 156 (44) | 110 (31) | 82 (23)  | 61 (17)  |
| 2   | 308 (100)  | 228 (74) | 142 (46) | 90 (29)  | 67 (22)  | 48 (16)  |
| 3   | 1034 (100) | 830 (80) | 553 (53) | 390 (38) | 292 (28) | 217 (21) |
| 4   | 581 (100)  | 440 (76) | 286 (49) | 195 (34) | 130 (22) | 95 (16)  |

Time (Years)

**Figure S7.** Overall survival time within the combined 2307TCGAsamples representing patients with bladder, lung adeno, lung squamous cell, ovarian and melanoma cancer when stratified by CSG.

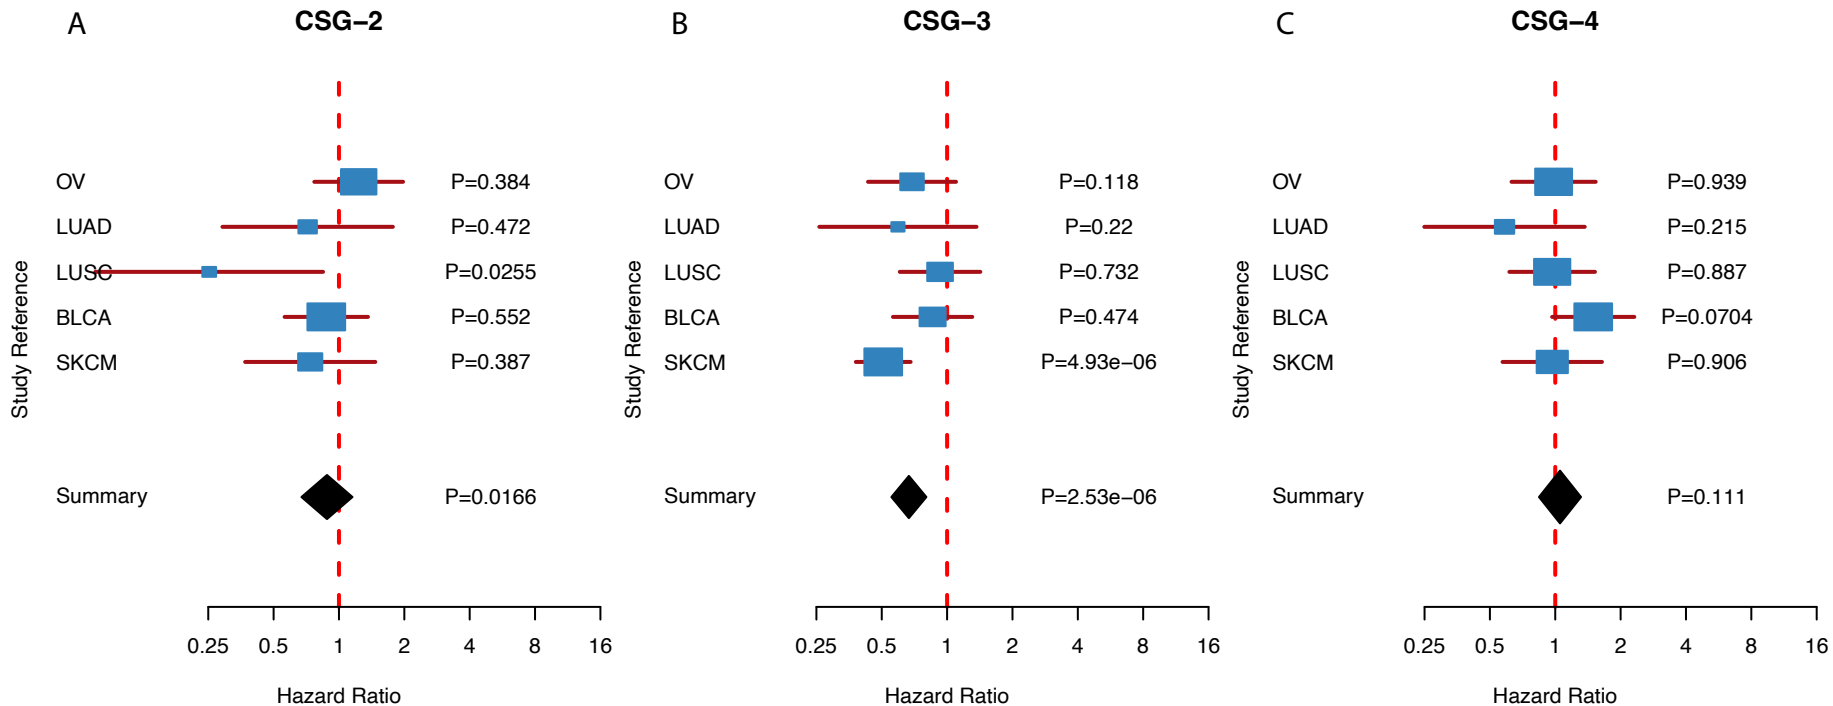

**Figure S8.** Meta-analysis of over-all survival time across bladder (BLCA), lung adeno (LUAD), lung squamous cell (LUSC), ovarian (OV), and melanoma (SKCM) samples, comparing CSG-1 against (A) CSG-2, (B) CSG-3, (C) CSG-4, respectively. This shows CSG-3 strongly associates with improved outcome. P-values for individual cancer types are based on Cox proportional hazard models. Summary P-value is calculated based on Fisher's method.

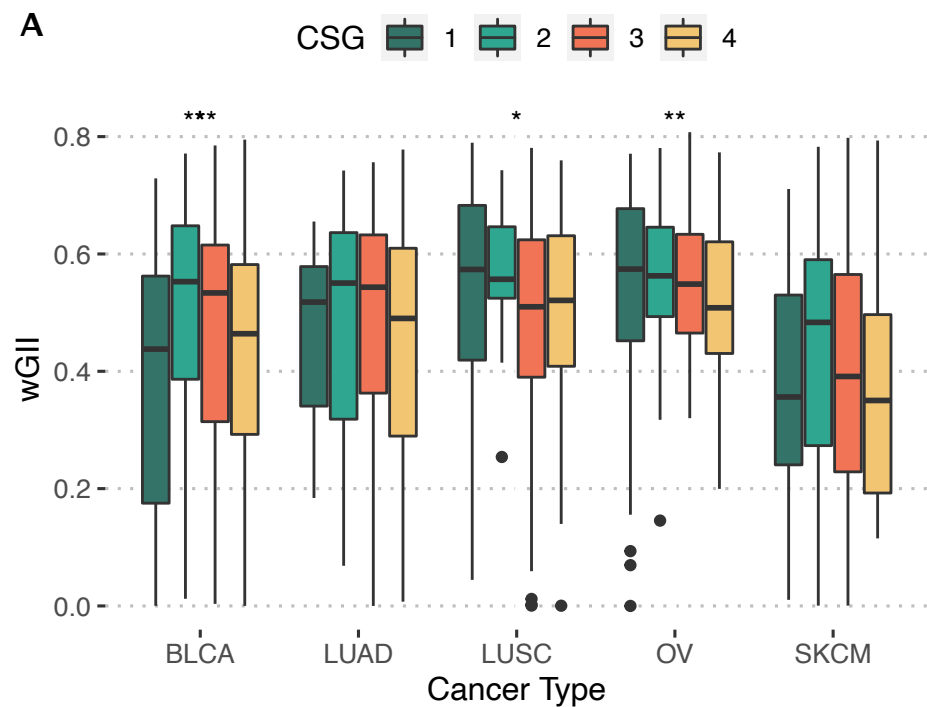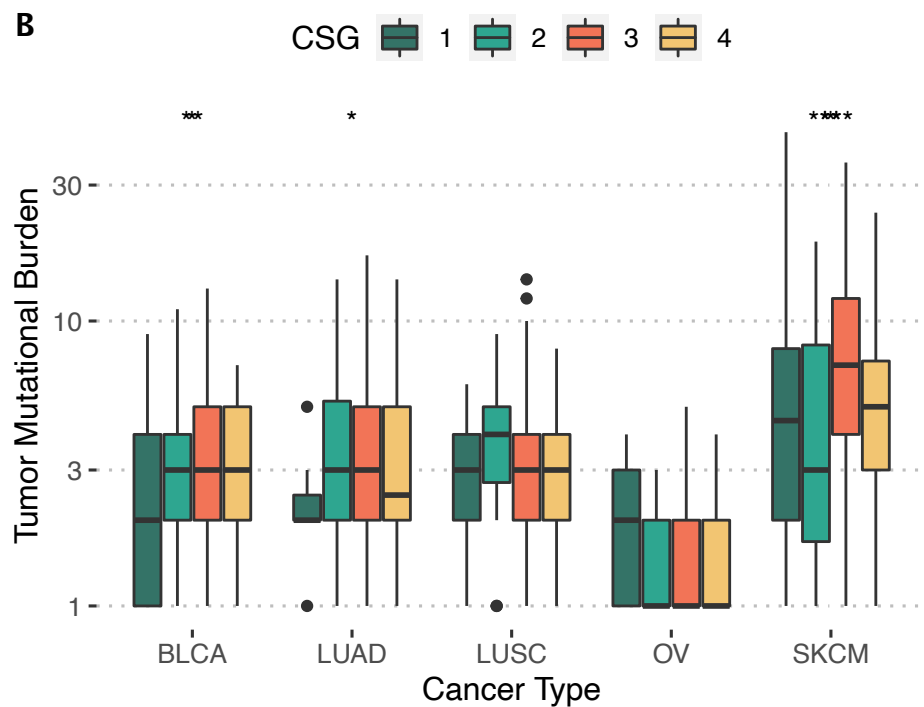

**Figure S9.** Distribution of (A) wGII and (B) tumour mutation burden by CSG and cancer type.

\* indicates  $p < 0.05$  within a given cancer type

**A CSG-1**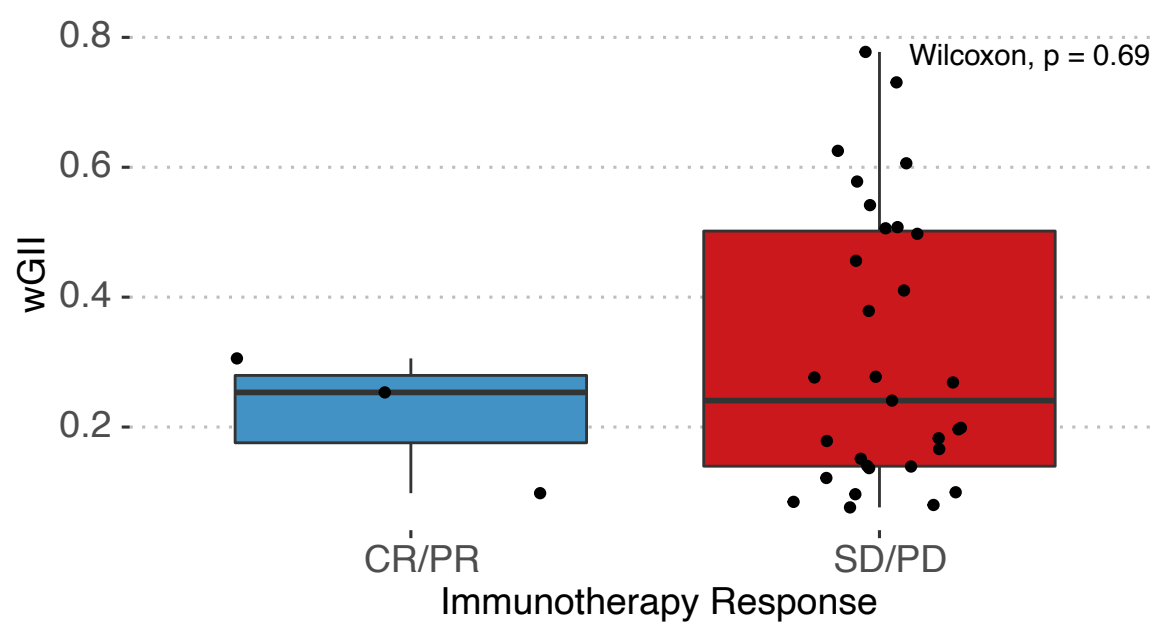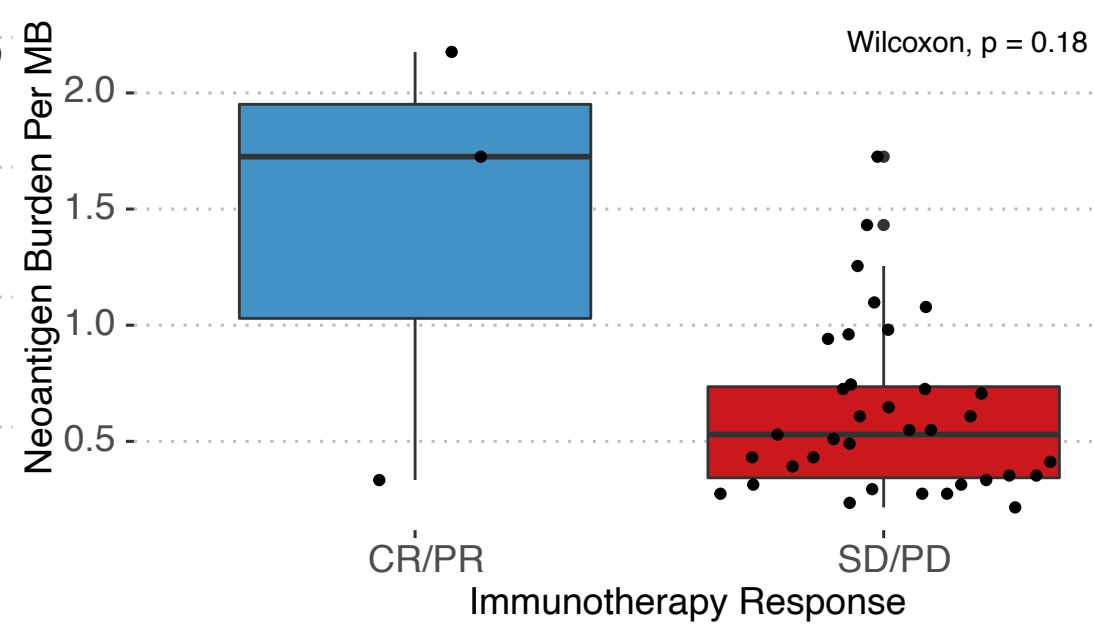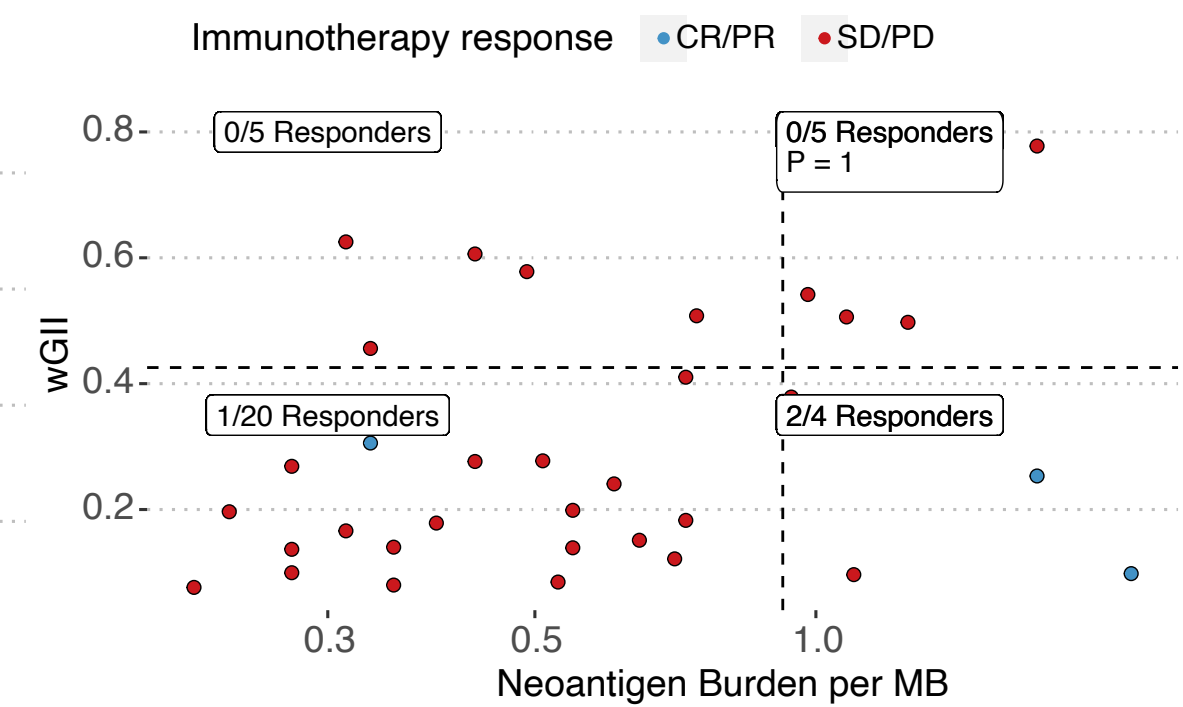**B CSG-2**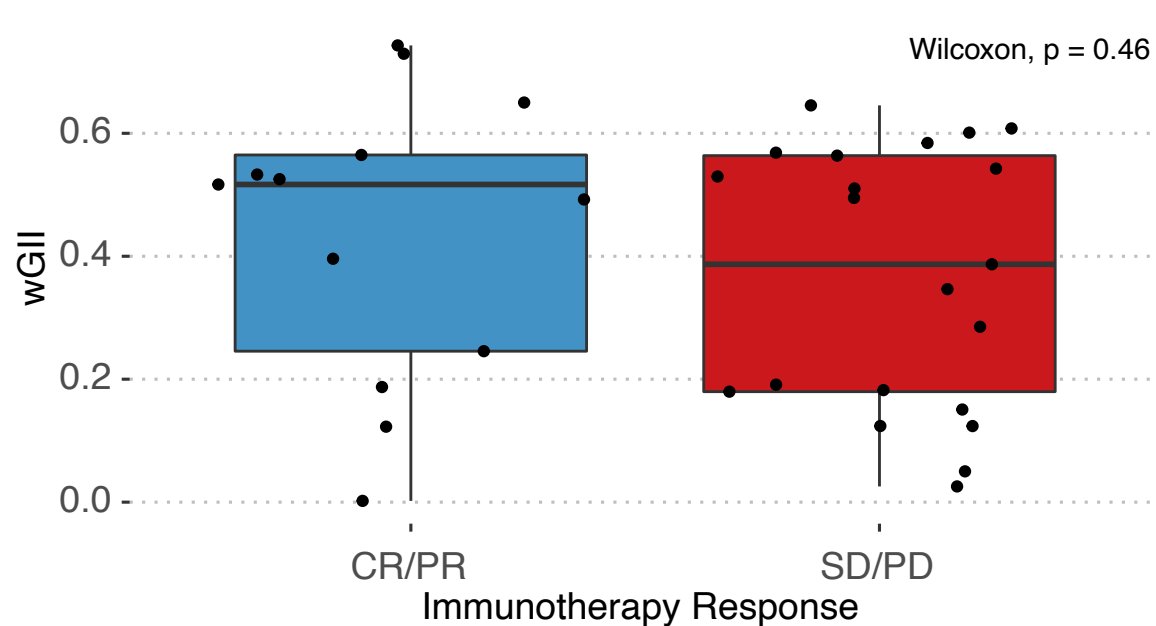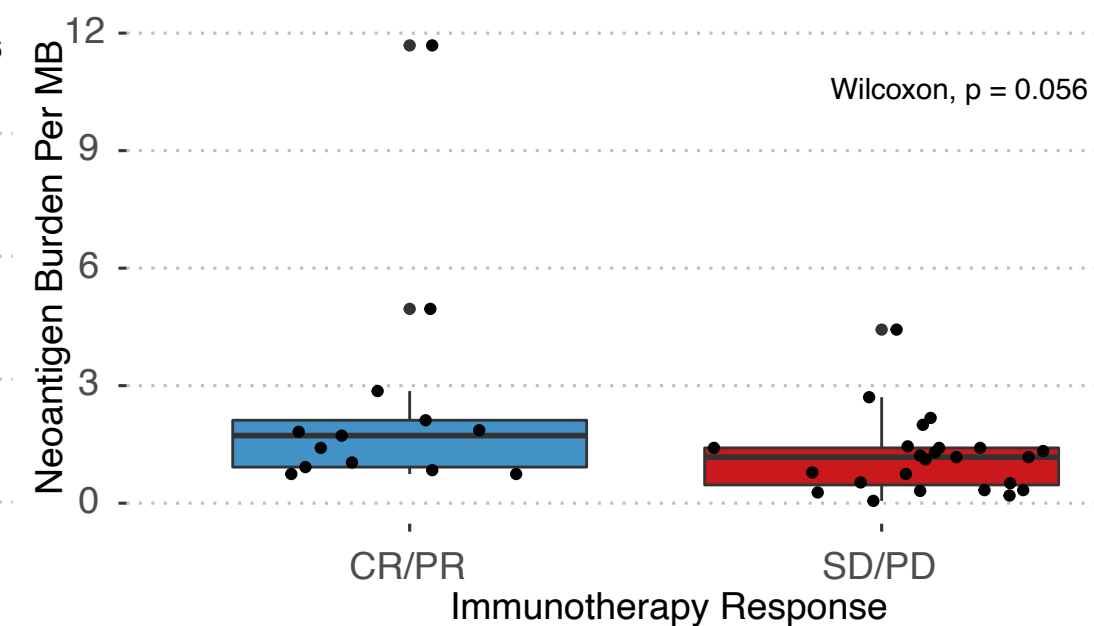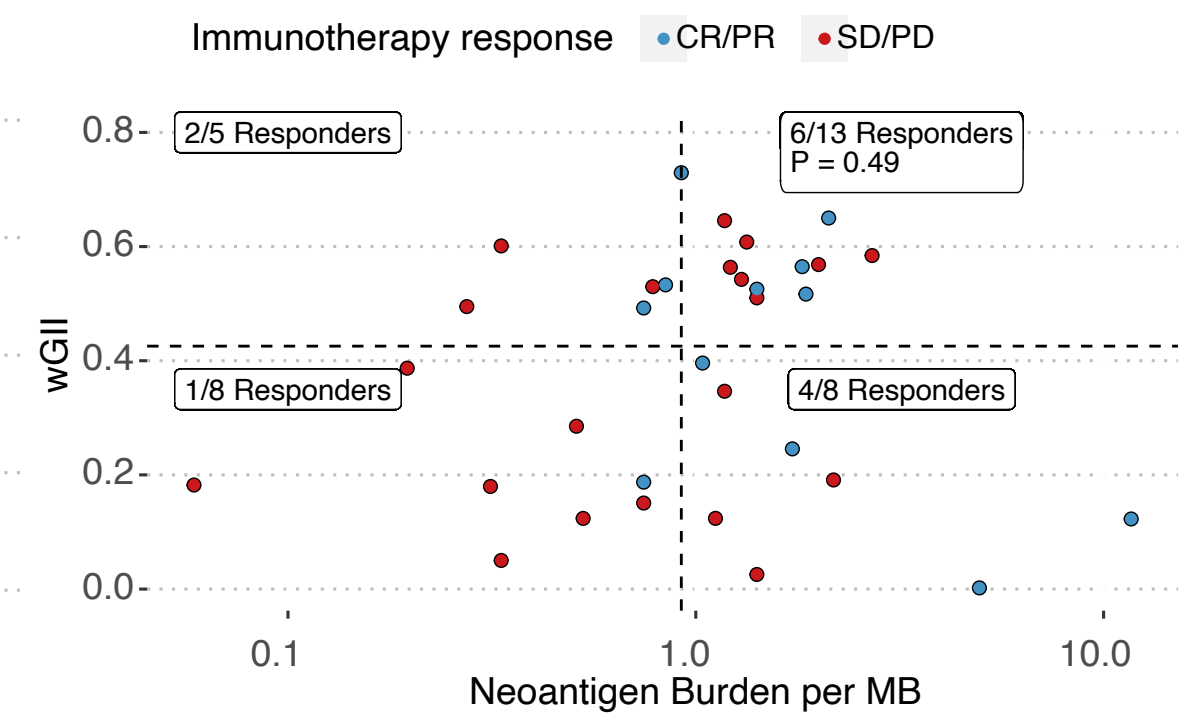**C CSG-3**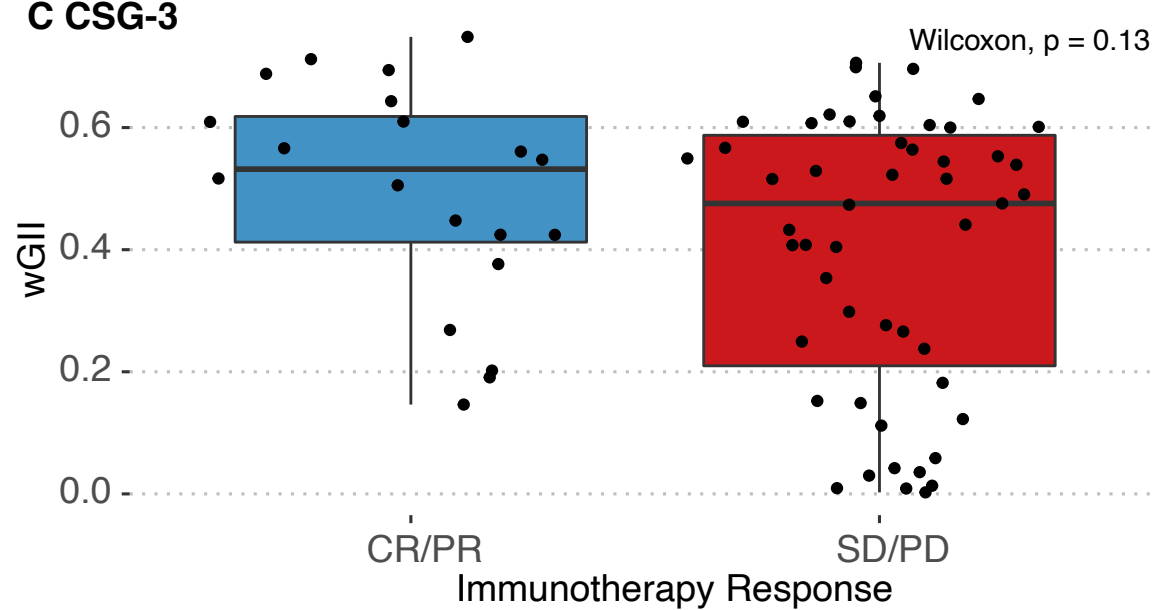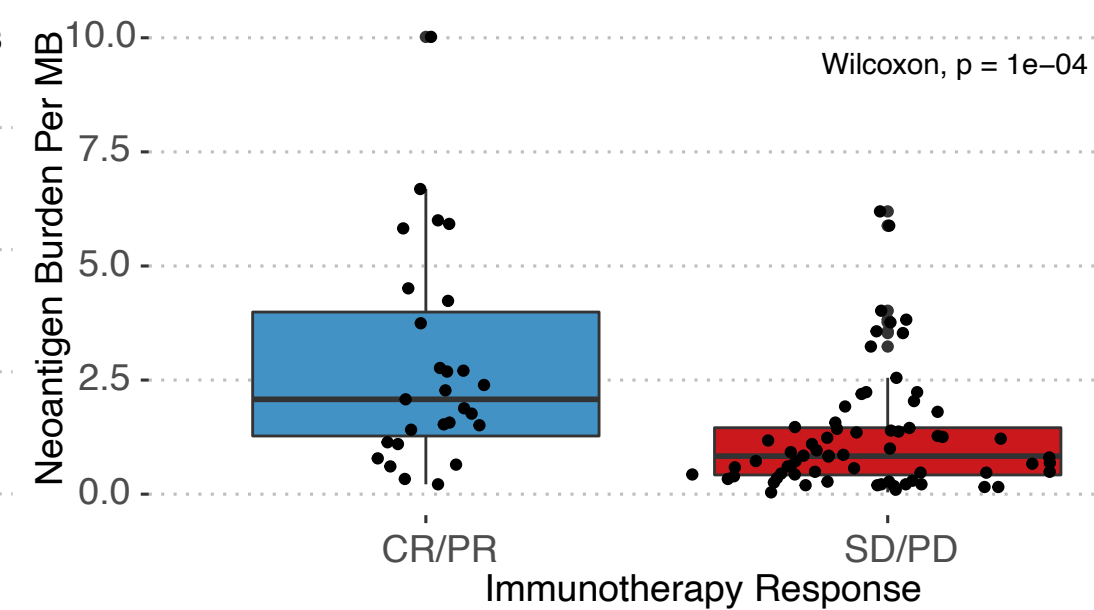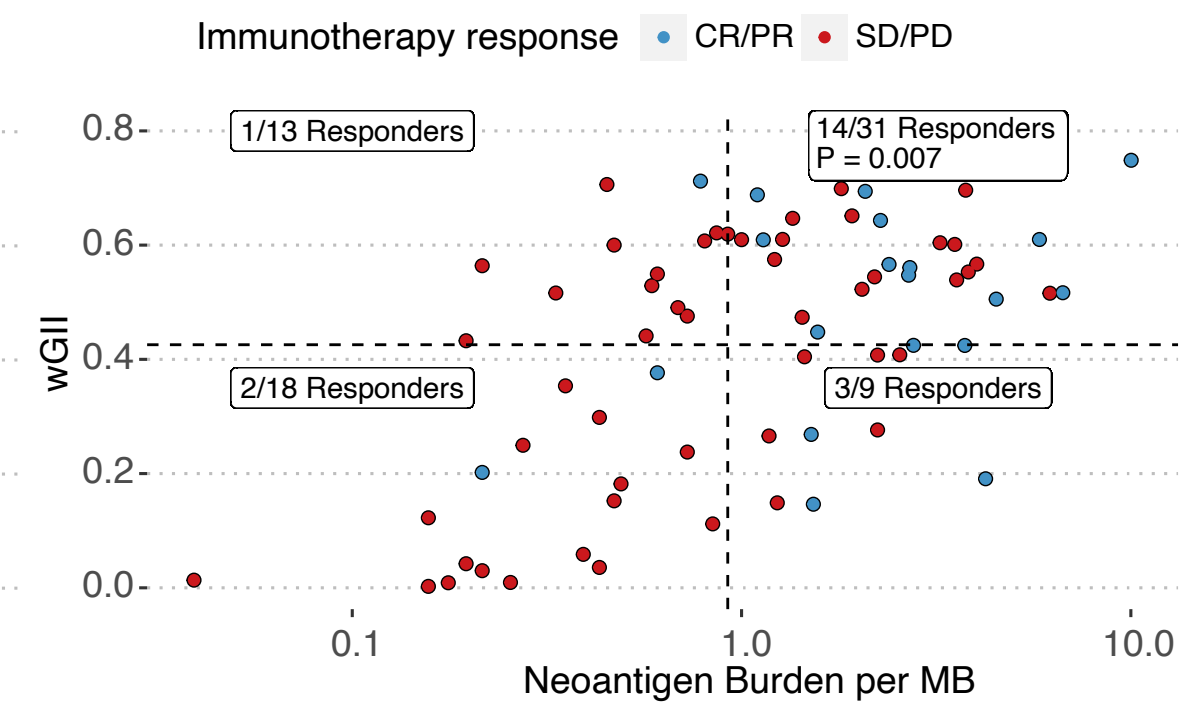**D CSG-4**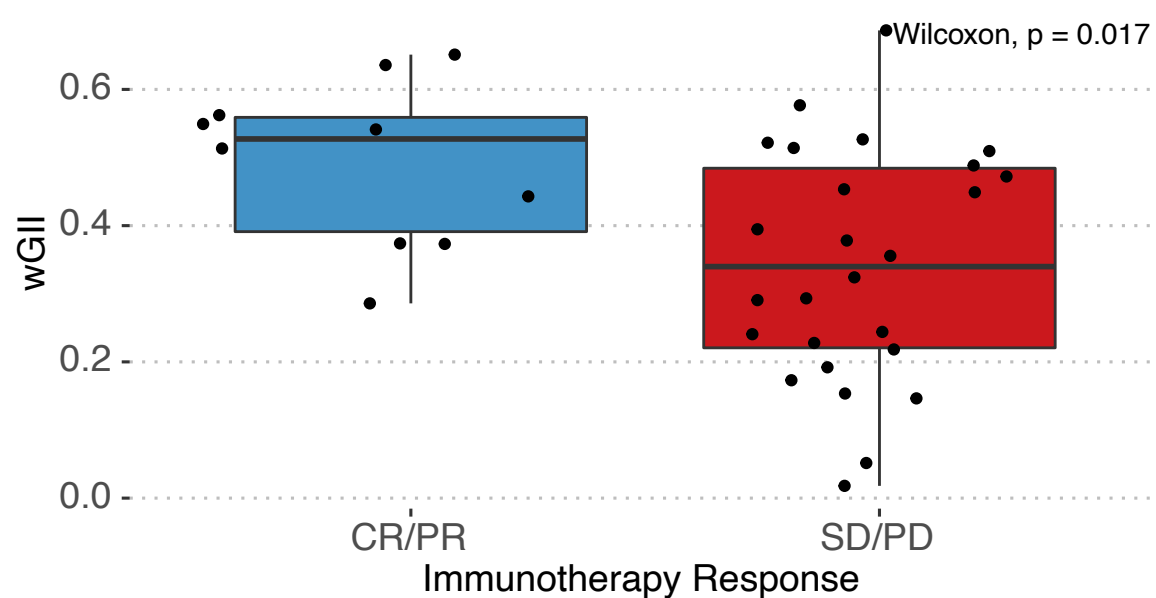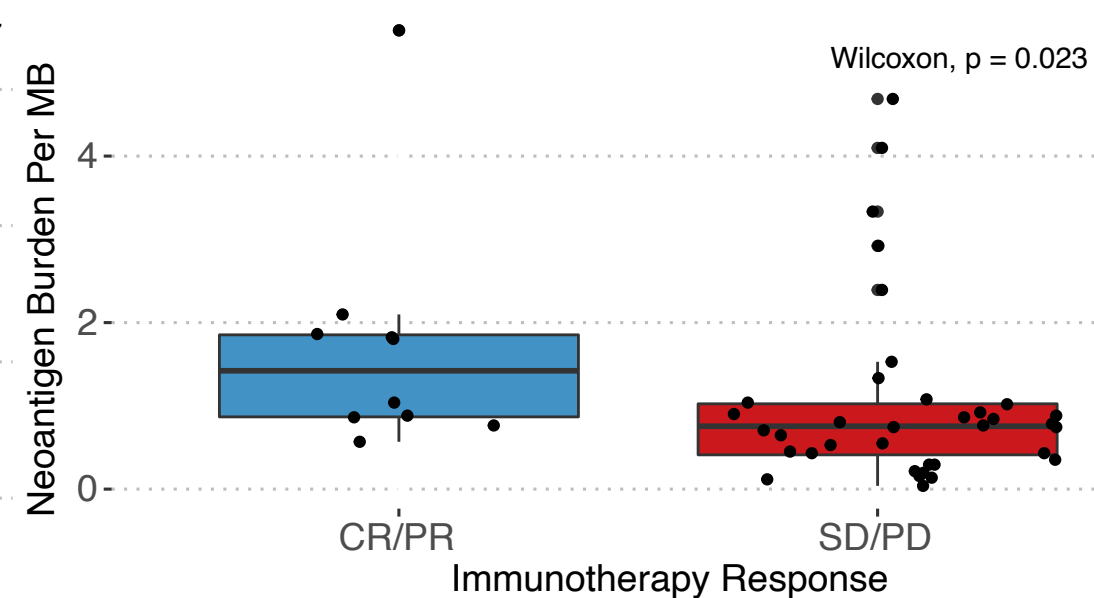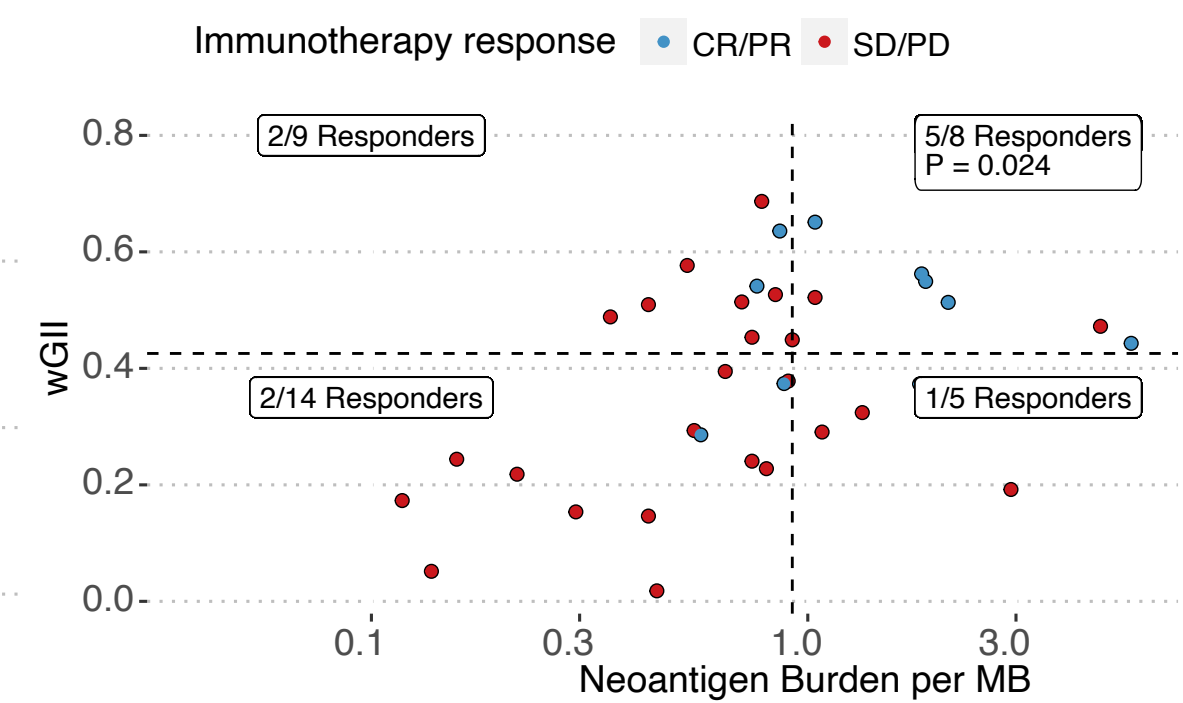

**Figure S10.** Immunotherapy response in the validation cohort, shown within CSG-1(A), CSG-2(B), CSG-3(C) and CSG-4(D). Each row shows binary therapy response against wGII and Neoantigen burden, and a scatter plot showing wGII versus neoantigen burden.

CR: Complete response. PR: Partial response. SD: Stable disease. PD: Progressive disease.

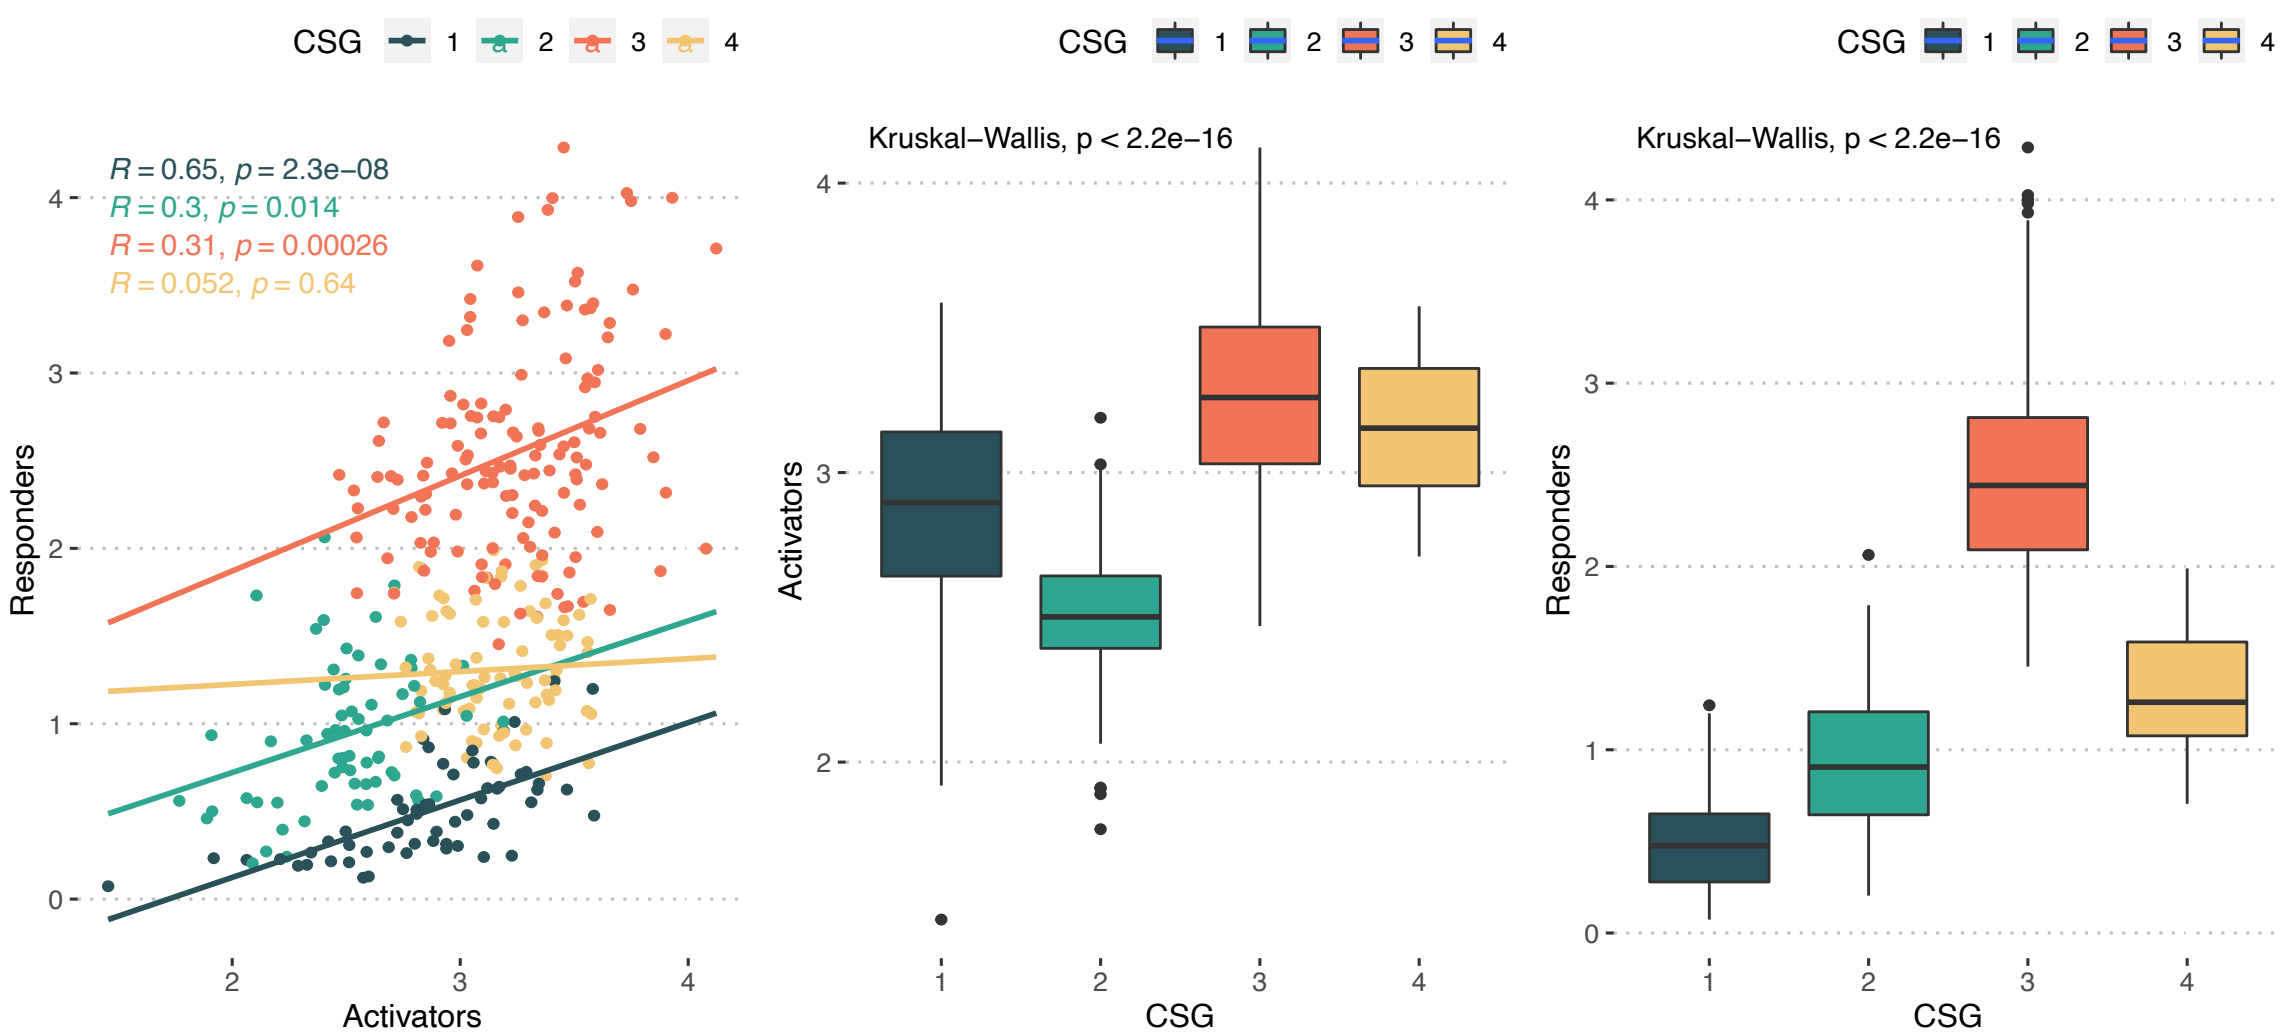

**Figure S11.** Analysis done on the test cohort indicates the difference between CSG-3 and CSG-4. CSG-3 shows positive correlation between mean expression of activator genes and mean value of responders genes (A). CSG-3 and CSG-4 show similar patterns in expression of activator genes (B) however responder genes are significantly lower in CSG-4 (C)

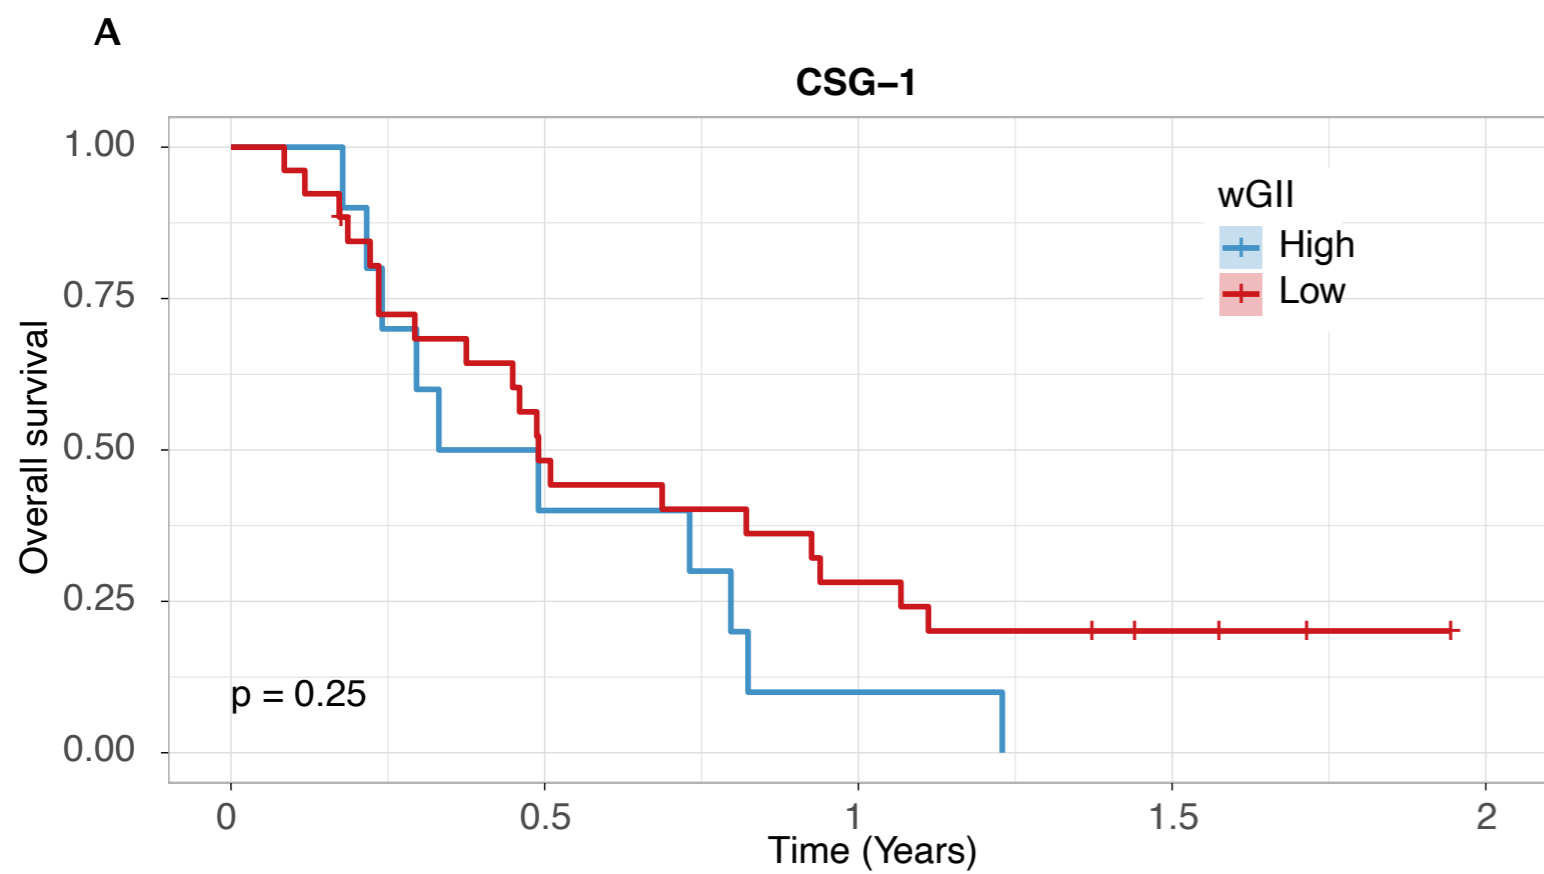

|      |      |          |         |        |        |       |
|------|------|----------|---------|--------|--------|-------|
| wGII | High | 10 (100) | 4 (40)  | 1 (10) | 0 (0)  | 0 (0) |
| wGII | Low  | 26 (100) | 12 (46) | 7 (27) | 3 (12) | 0 (0) |

Number at risk: n (%)

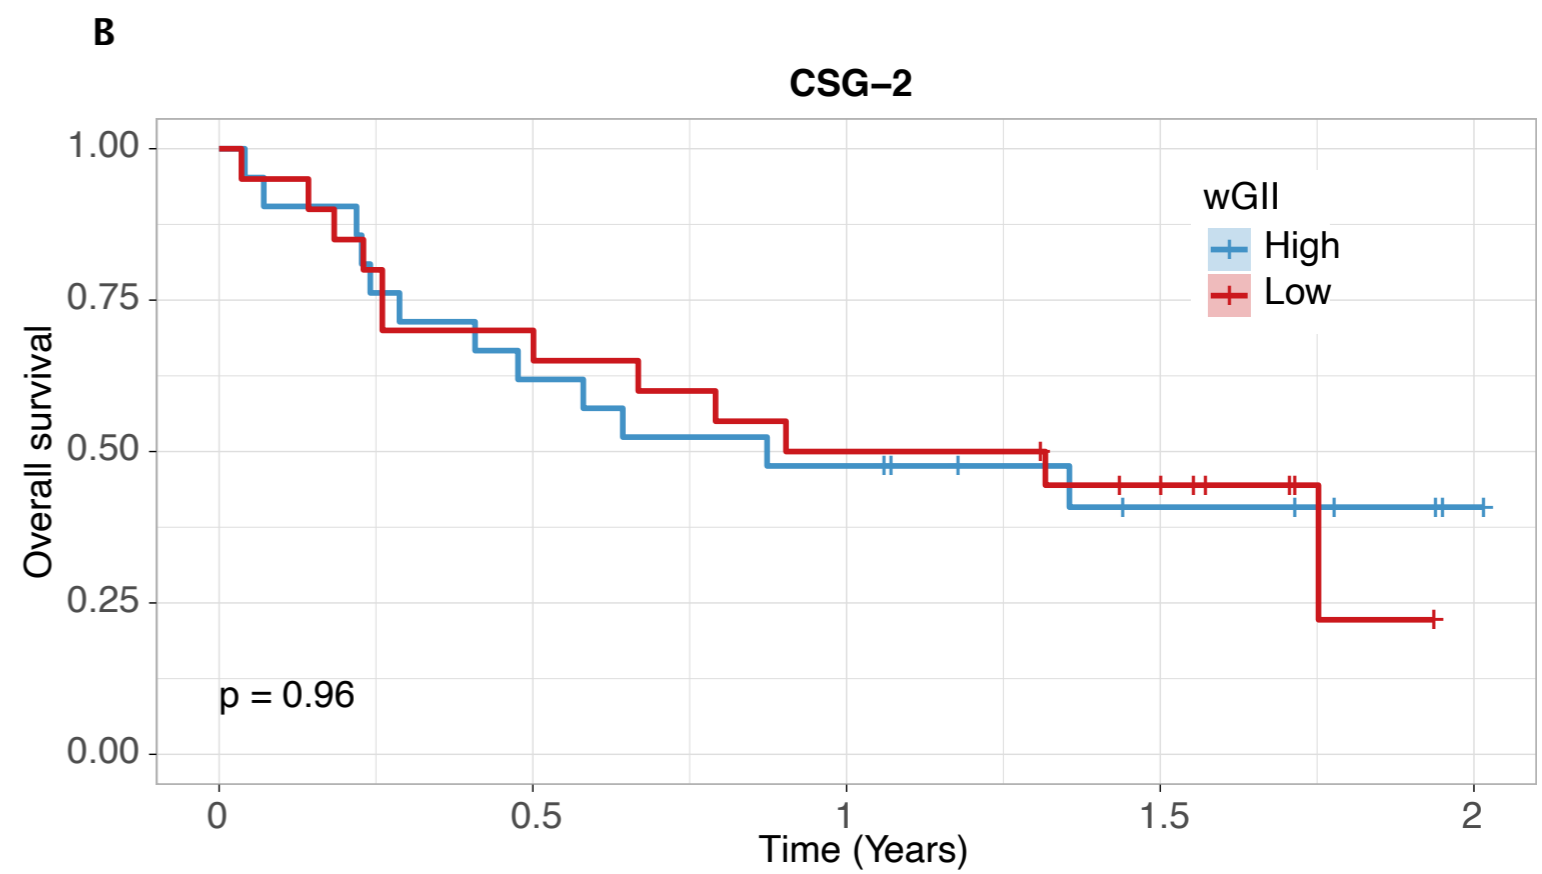

|      |      |          |         |         |        |       |
|------|------|----------|---------|---------|--------|-------|
| wGII | High | 21 (100) | 13 (62) | 10 (48) | 5 (24) | 1 (5) |
| wGII | Low  | 20 (100) | 14 (70) | 10 (50) | 7 (35) | 0 (0) |

Number at risk: n (%)

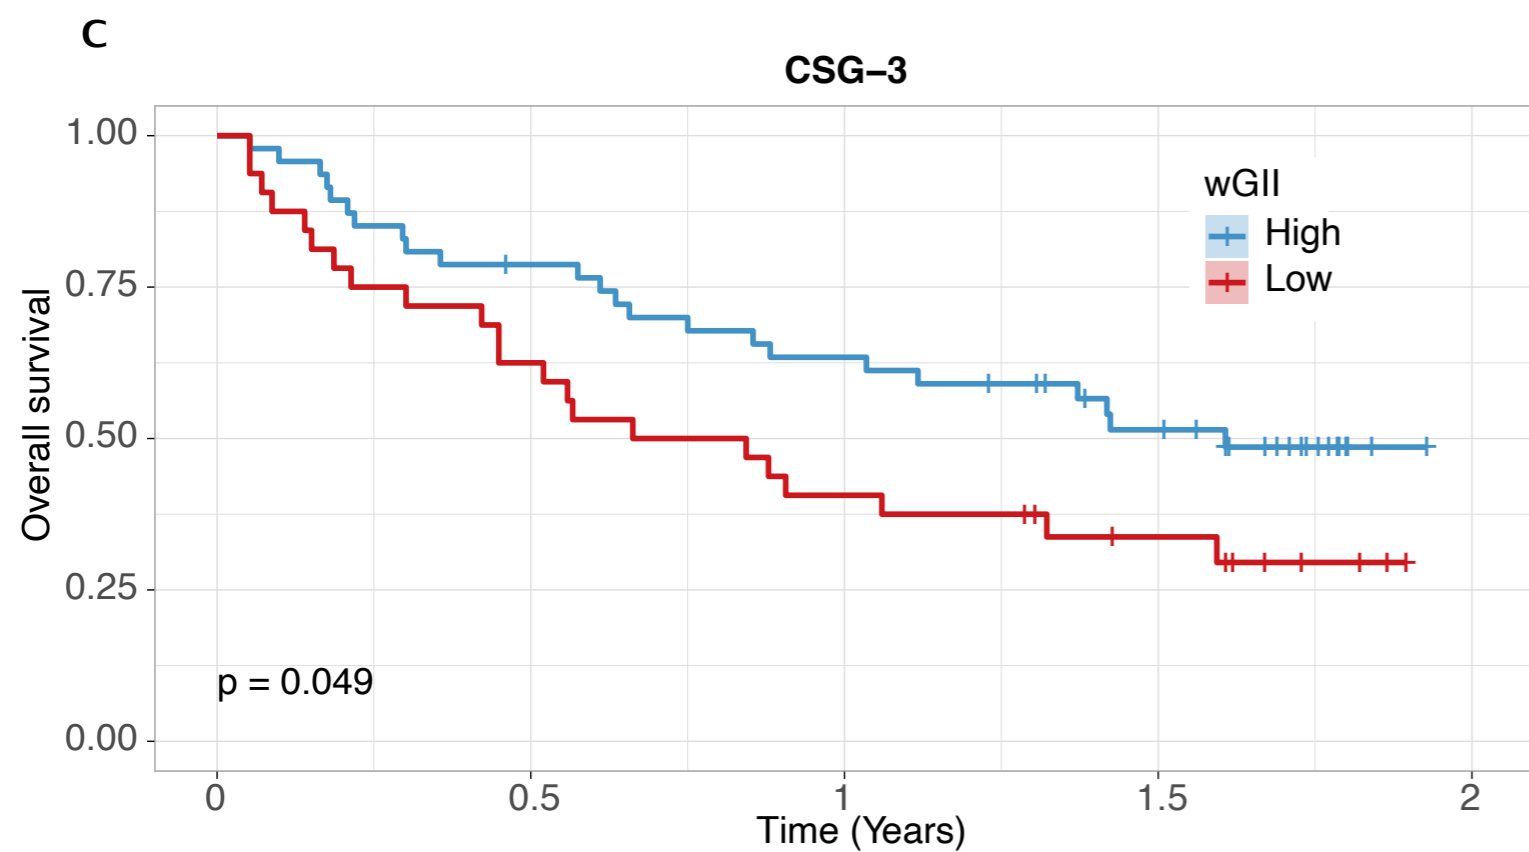

|      |      |          |         |         |         |       |
|------|------|----------|---------|---------|---------|-------|
| wGII | High | 47 (100) | 36 (77) | 29 (62) | 20 (43) | 0 (0) |
| wGII | Low  | 32 (100) | 20 (62) | 13 (41) | 8 (25)  | 0 (0) |

Number at risk: n (%)

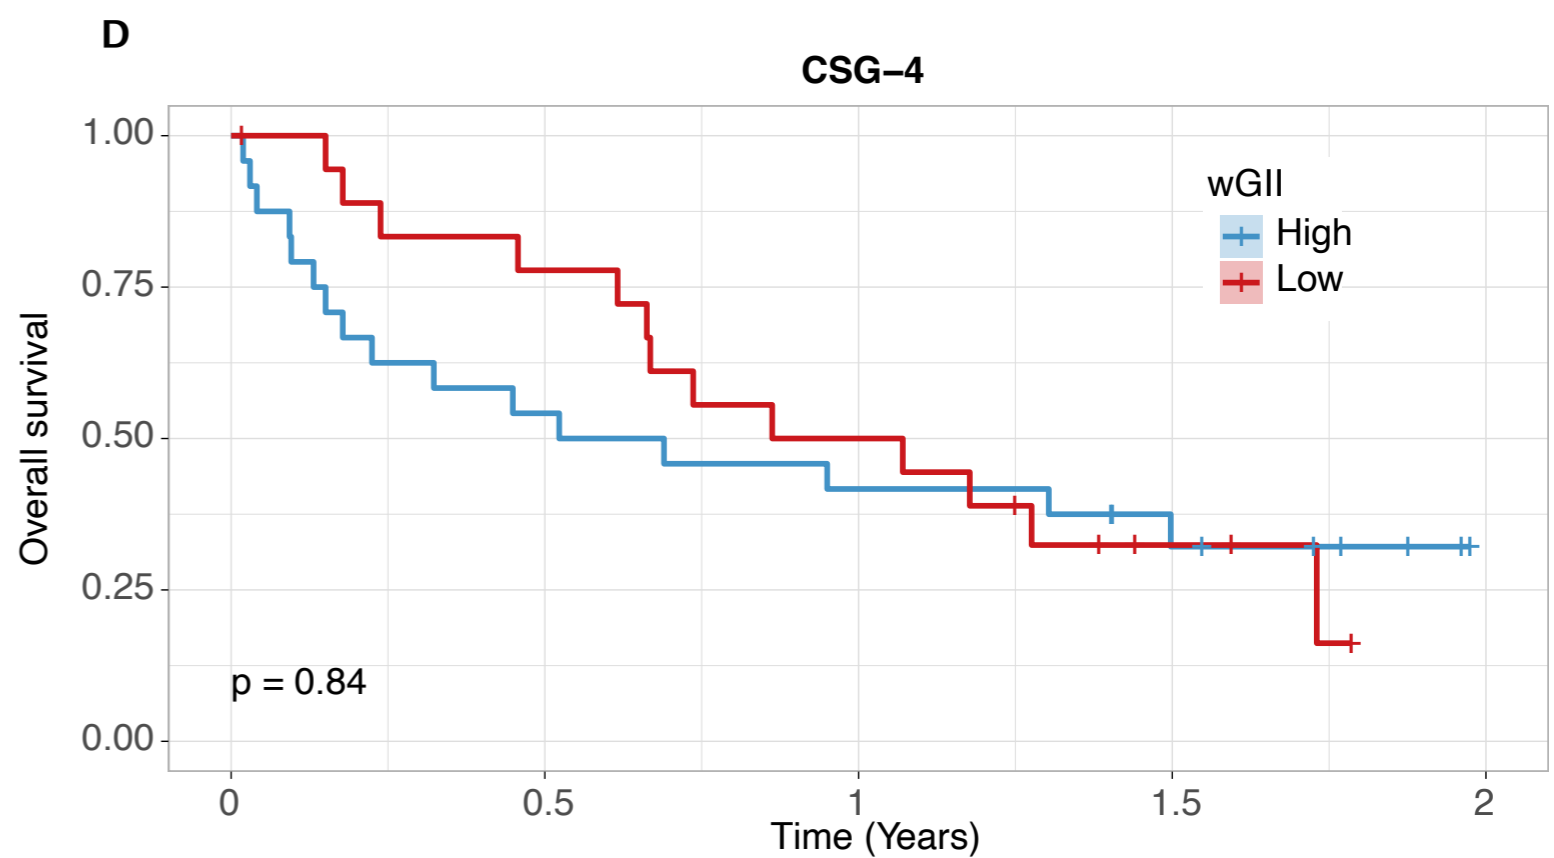

|      |      |          |         |         |        |       |
|------|------|----------|---------|---------|--------|-------|
| wGII | High | 24 (100) | 13 (54) | 10 (42) | 6 (25) | 0 (0) |
| wGII | Low  | 19 (100) | 14 (74) | 9 (47)  | 3 (16) | 0 (0) |

Number at risk: n (%)

**Figure S12.** Kaplan-Meier analysis of the validation cohort, showing overall survival by CSG 1-4 when split into high and low wGII based on the median value of the cohort.
